# Supplementary material for: Spectroscopic characterization and reactivity studies of a copper(ii) iminoxyl radical complex
Source: Royal Society of Chemistry journal article supplement (doi:10.1039/d4cc02922d), 2024-01-01
Supplement: d4cc02922d1.pdf [file d4cc02922d1.pdf]

## Supporting Information for

### **Spectroscopic characterization and reactivity studies of a copper(II) iminoxyl radical complex**

Simarjeet Kaur,<sup>a</sup> Avijit Das,<sup>a</sup> Lucia Velasco,<sup>b</sup> Maxime Sauvan,<sup>b</sup> Moumita Bera,<sup>a</sup> Ashok Ugale,<sup>b</sup> Asterios Charisiadis<sup>b</sup>, Dooshaye Moonshiram,<sup>\*b</sup> Sayantan Paria<sup>\*a</sup>

<sup>[a]</sup>Department of Chemistry, Indian Institute of Technology Delhi, Hauz Khas, New Delhi-110016; E-mail: sparia@chemistry.iitd.ac.in

<sup>[b]</sup>Instituto de Ciencia de Materiales de Madrid, Consejo Superior de Investigaciones Científicas, Sor Juana Inés de la Cruz, 3, 28049 Madrid, Spain; Email: dooshaye.moonshiram@csic.es

#### **Table of Contents**

|                                                |         |
|------------------------------------------------|---------|
| Table of Contents                              | S1      |
| General and physical methods used in the study | S2–S9   |
| Synthesis and Characterization                 | S9–S30  |
| DFT Studies                                    | S30–S46 |
| References                                     | S46     |

#### **Author Contributions**

SK synthesized and characterized the Cu complexes used in this study. AD and MB also contributed to the synthesis part. SK performs and analyses all kinetic studies. LV, MS, AU, and AC contributed to the preparation of the samples for X-ray absorption spectroscopy studies, data collection, analysis, and DFT studies. DM supervised the X-ray absorption spectroscopy and DFT studies described in the study. SP supervised the project. All authors contributed to writing the manuscript.

**General.** All chemicals used in this study were purchased from commercial sources and used as received. Anhydrous acetonitrile, and methanol were purchased from Sigma-Aldrich and used as received.  $\text{Cu}(\text{ClO}_4)_2 \cdot 6\text{H}_2\text{O}$  and ferrocene substrates were procured from Sigma Aldrich and used without further purification. Diethyl ether was purified over sodium/benzophenone. The ligand  $\text{H}_2\text{L}_1$  was prepared following a literature procedure.<sup>1</sup> TEMPOH was synthesized according to the literature procedure.<sup>2</sup> Synthesis and manipulations of all air-sensitive compounds were performed either in an  $\text{N}_2$ -filled glovebox (Vigor Tech) or using standard Schlenk techniques. Caution: *Although no problems were encountered during the synthesis of the complex, perchlorate salts are potentially explosive and should be handled with care!*<sup>3</sup>

## Experimental Section

**Elemental analysis.** A PerkinElmer 2400 Series II CHNS/O instrument was used to perform the CHN analysis of the Cu complexes used in this study.

**Infrared Spectroscopy.** Fourier transform infrared spectra of the Cu complexes (**1**, **1-ox**) were recorded on a KBr pellet in a Nicolet protégé 460 ESP instrument.

**Mass spectra.** ESI mass spectra of the ligands and Cu complexes were recorded in Waters Xevo-G2XQTOF instruments with the electrospray ionization (ESI) source. GC-mass spectra of the organic compounds were measured in an Agilent 7890B GC system fitted with an FID detector and an Agilent 5977B GC/MSD mass detector.

**NMR spectroscopy.** The  $^1\text{H}$ -NMR spectra of the organic compounds and Cu complex were recorded in a Bruker 400 MHz (DPX-400) or 500 MHz (DPX-500) NMR instruments. Low-temperature NMR of the Cu complexes was measured in a JEOL-JNM-ECA Series (Delta V4.3)-400 MHz-FT-NMR instrument. Solution magnetic moments of the Cu complexes were determined by Evans' method following literature procedures.<sup>4</sup>

**Electron Paramagnetic Resonance Spectroscopy.** X-band EPR data described in this study were recorded in a Bruker A300 spectrometer at 77 K using a liquid  $\text{N}_2$  finger Dewar. The EPR samples of **1** (2 mM) were prepared in MeOH. The samples (~400  $\mu\text{L}$ ) were introduced in the EPR tubes and sealed using septa inside an  $\text{N}_2$ -filled glove box. Then, the data were recorded at 77 K. EPR data was processed using Bruker WinEPR and simulated using SymFonia software.

**Preparation of 1-ox:** A 400  $\mu\text{L}$  methanol solution of **1** (2 mM) was introduced in an EPR tube inside the glove box and sealed with a septum. The EPR tube was taken outside the glove box and placed in an Eyla low-temperature reaction bath pre-cooled at  $-40\text{ }^\circ\text{C}$ . After 5 minutes, one equiv. of ceric ammonium nitrate (30  $\mu\text{L}$  of a 40 mM methanol solution, one equiv.) was slowly introduced into the reaction solution using a Hamilton microliter syringe. Then, the solution was quickly purged with nitrogen for 2 minutes to make the solution homogeneous before dipping the tube in a liquid nitrogen bath. The sample was then taken for the EPR measurement.

**Electrochemical Measurements.** Cyclic voltammetry (CV) and differential pulse voltammetry (DPV) data reported in this study were recorded using a CH Instrument (CHI 760E, CH Instrument, USA) in a typical three-electrode set-up. A glassy carbon working

electrode, Pt wire counter electrode, and Ag/AgCl in saturated KCl or Ag wire as pseudo reference electrodes were utilized during the measurements. All measurements were made in methanol or acetonitrile solutions at 25 °C using ferrocene (Fc) as the internal standard (with respect to the Fc<sup>+</sup>/Fc couple) and tetrabutylammonium perchlorate (<sup>n</sup>Bu<sub>4</sub>NClO<sub>4</sub>) as the supporting electrolyte. The  $E_{1/2}$  values for the ferrocene derivatives were calculated from the DPV data using the Parry-Osteryoung Equation ( $E_{1/2} = E_p + \Delta E/2$ ).<sup>5</sup>  $\Delta E$  is the amplitude.

**Kinetic Study.** All of the kinetic measurements reported in this study were conducted in an Agilent 8454 Diode Array Spectrophotometer equipped with a liquid nitrogen-controlled UNISOKU low-temperature cryostat, which can control the temperature of a reaction solution over a temperature range of -80 to 100 °C within  $\pm 0.1$  °C accuracy.

A 10 or 25 mL stock solution of the Cu(II) complexes (**1**, 0.1–0.3 mM) in methanol was prepared inside a glove box. A 2.4 mL solution of the complex solution was introduced in a long-neck cuvette inside the glove box, sealed with a rubber septum, and taken outside the glove box. The cuvette was subsequently placed in the pre-cooled cryostat fitted at the spectrophotometer at a desired temperature. Then, a methanolic solution of ceric ammonium nitrate (one equiv. with respect to complex) was introduced into the Cu(II) complex solution at -40 °C to -60 °C via a Hamilton syringe connected to a long needle. Once the formation of the oxidized Cu(II) complex was complete (**1-ox**), a substrate solution (10–100  $\mu$ L) was added to the reaction mixture, stirred vigorously, and the reaction was monitored by UV-vis spectroscopy following the decay of species **1-ox**. Pseudo-first-order rate-constant ( $k_{\text{obs}}$ ) was estimated from the slope of a plot of  $\ln(A-A_\infty)$  vs. time (s), and second-order rate-constant ( $k_2$ ) was determined from the slope of a plot of  $k_{\text{obs}}$  vs [substrate]. In the reactions studied under second-order reaction conditions,  $k_2$  values were determined from the slope of a plot of  $1/[\mathbf{1-ox}]$  vs. time (s).

**X-ray Crystallography.** Single crystals of **1** suitable for single-crystal X-ray diffraction studies were selected from an acetonitrile/diethyl ether solution containing the crystals and immediately immersed into the Paratone oil, followed by mounting on a nylon loop under a 100 K nitrogen cold stream. Data collections were performed on a Bruker D8 VENTURE Microfocus diffractometer equipped with PHOTON II Detector, with Mo K $\alpha$  radiation ( $\lambda = 0.71073$  Å), controlled by the APEX III (v2017.3-0) software package. The raw data were integrated and corrected for Lorentz and polarization effects with the aid of the Bruker APEX III program suite.<sup>6</sup> Structures were solved by the intrinsic phasing method and refined against all data in the reported  $2\theta$  ranges by full-matrix least squares method based on F2 using the SHELXL program suite.<sup>7</sup> Hydrogen atoms at idealized positions were incorporated in final refinements. The non-hydrogen atoms were treated anisotropically. Diagrams for the complexes were prepared using the Mercury software.<sup>8</sup> The crystallographic data and final agreement factors for the complex are provided in Table S1, S2.

**Table S1.** Summary of X-ray crystallographic data of Cu complex **1**.

|                                                  | <b>1</b>                                                          |
|--------------------------------------------------|-------------------------------------------------------------------|
| Empirical formula                                | C <sub>22</sub> H <sub>21</sub> ClCuN <sub>6</sub> O <sub>6</sub> |
| Formula weight                                   | 564.45                                                            |
| Crystal system                                   | Monoclinic                                                        |
| Space group                                      | P 21/n                                                            |
| <i>a</i> (Å)                                     | 10.905(6)                                                         |
| <i>b</i> (Å)                                     | 19.645(10)                                                        |
| <i>c</i> (Å)                                     | 11.608(6)                                                         |
| $\alpha$ (deg.)                                  | 90                                                                |
| $\beta$ (deg.)                                   | 104.342(17)                                                       |
| $\gamma$ (deg.)                                  | 90                                                                |
| Volume (Å <sup>3</sup> )                         | 2409(2)                                                           |
| <i>Z</i>                                         | 4                                                                 |
| <i>D</i> <sub>calcd.</sub> (mg/m <sup>3</sup> )  | 1.556                                                             |
| $\mu$ Mo-K $\alpha$ (mm <sup>-1</sup> )          | 1.069                                                             |
| <i>F</i> (000)                                   | 1158.8                                                            |
| $\theta$ range (deg.)                            | 2.09 to 32.840                                                    |
| Reflections collected                            | 56315                                                             |
| Reflections unique                               | 4101                                                              |
| <i>R</i> (int)                                   | 0.0842                                                            |
| Data ( <i>I</i> > 2 $\sigma$ ( <i>I</i> ))       | 8050                                                              |
| Parameters refined                               | 332                                                               |
| Goodness-of-fit on <i>F</i> <sup>2</sup>         | 1.138                                                             |
| <i>R</i> 1 [ <i>I</i> > 2 $\sigma$ ( <i>I</i> )] | 0.0846                                                            |
| <i>wR</i> 2                                      | 0.2198                                                            |

**Table S2.** Important bond lengths (Å) and bond angles (°) for complex **1**.

| Bond Length (Å) | <b>1</b> |
|-----------------|----------|
| Cu(1)–N(1)      | 1.912(3) |
| Cu(1)–N(2)      | 1.929(4) |
| Cu(1)–N(3)      | 1.920(4) |
| Cu(1)–N(4)      | 1.916(3) |
| Cu(1)–O(3)      | 2.419(4) |
| N(1)–N(2)       | 2.892(6) |
| O(1)–O(2)       | 2.515(6) |
| Bond angle (°)  |          |
| N(1)–Cu(1)–N(2) | 97.7(2)  |
| N(2)–Cu(1)–N(3) | 174.0(2) |
| N(3)–Cu(1)–N(4) | 94.2(1)  |
| N(1)–Cu(1)–N(3) | 83.8(2)  |
| N(2)–Cu(1)–N(4) | 83.6(2)  |
| N(1)–Cu(1)–N(4) | 173.4(2) |

**X-ray Absorption Spectroscopy (XAS) Methods.** X-ray absorption spectra were collected at the Diamond light Source (Oxford, UK) on bending magnet beamline BL18 at electron energy 8.98 KeV and an average current of 100 mA. The radiation was monochromatized by Si(110) crystal monochromator. The intensity of the X-rays were monitored by three ion chambers ( $I_0$ ,  $I_1$  and  $I_2$ ) filled with 70 % nitrogen and 30 % Helium and placed before the sample ( $I_0$ ) and after the sample ( $I_1$  and  $I_2$ ). Cu metal was placed between ion chambers  $I_1$  and  $I_2$ , and its absorption was recorded with each scan for energy calibration. Cu XAS energy was calibrated by the first maxima in the second derivative of the copper's metal foil's X-ray absorption near edge structure (XANES) spectrum. The samples were kept at 20 K in a He atmosphere at ambient pressure and recorded as fluorescence excitation spectra using a 44-element energy-resolving Ge detector. The solution complexes were measured in the continuous helium flow cryostat in fluorescence mode. Around 40 XAS spectra of each sample were collected. Care was taken to measure at several sample positions on each sample, and no more than 5 scans were taken at each sample position. In order to reduce the risk of sample damage by x-ray radiation, 80% flux was used (beam size 1000  $\mu\text{m}$  (Horizontal) x 2000  $\mu\text{m}$  (Vertical)), and no damage was observed scan after scan to any samples. All samples were also protected from the X-ray beam during spectrometer movements by a shutter synchronized with the scan program.

Cu XAS energy was calibrated by the first maxima in the second derivative of the copper's metal X-ray Absorption Near Edge Structure (XANES) spectrum.

**Extended X-ray Absorption Fine Structure (EXAFS) Analysis.** Athena software<sup>9</sup> was used for data processing. The energy scale for each scan was normalized using the copper metal standard. Data in energy space were pre-edge corrected, normalized, deglitched (if necessary), and background corrected. The processed data were next converted to the photoelectron wave vector ( $k$ ) space and weighted by  $k^2$ . The electron wave number is defined as  $k = [2m(E - E_0)/\hbar^2]^{1/2}$ ,  $E_0$  is the energy origin or the threshold energy. K-space data were truncated near the zero crossings  $k = 1.5$  to  $14 \text{ \AA}^{-1}$  in Cu EXAFS before Fourier transformation. The k-space data were transferred into the Artemis Software for curve fitting. In order to fit the data, the Fourier peaks were isolated separately, grouped together, or the entire (unfiltered) spectrum was used. The individual Fourier peaks were isolated by applying a Hanning window to the first and last 15% of the chosen range, leaving the middle 70% untouched. Curve fitting was performed using *ab initio*-calculated phases and amplitudes from the FEFF8<sup>10</sup> program from the University of Washington. *Ab initio*-calculated phases and amplitudes were used in the EXAFS equation S1.

$$\chi(k) = S_0^2 \sum_j \frac{N_j}{kR_j^2} f_{\text{eff}_j}(\pi, k, R_j) e^{-2\sigma_j^2 k^2} e^{\frac{-2R_j}{\lambda_j(k)}} \sin(2kR_j + \phi_j(k)) \quad (\text{S1})$$

where  $N_j$  is the number of atoms in the  $j^{\text{th}}$  shell;  $R_j$  the mean distance between the absorbing atom and the atoms in the  $j^{\text{th}}$  shell;  $f_{\text{eff}_j}(\pi, k, R_j)$  is the *ab initio* amplitude function for shell  $j$ , and the Debye-Waller term  $e^{-2\sigma_j^2 k^2}$  accounts for damping due to static and thermal disorder in absorber-backscatterer distances. The mean free path term  $e^{\frac{-2R_j}{\lambda_j(k)}}$  reflects losses due to inelastic scattering, where  $\lambda_j(k)$ , is the electron mean free path. The oscillations in the EXAFS spectrum are reflected in the sinusoidal term  $\sin(2kR_j + \phi_j(k))$ , where  $\phi_j(k)$  is the *ab initio* phase function for shell  $j$ . This sinusoidal term shows the direct relation between the frequency of the EXAFS oscillations in k-space and the absorber-backscatterer distance.  $S_0^2$  is an amplitude reduction factor.

The EXAFS equation<sup>11</sup> (Eq. S1) was used to fit the experimental Fourier isolated data (q-space) as well as unfiltered data (k-space) and Fourier transformed data (R-space) using  $N$ ,  $S_0^2$ ,  $E_0$ ,  $R$ , and  $\sigma^2$  as variable parameters.  $N$  refers to the number of coordination atoms surrounding Cu for each shell. The quality of fit was evaluated by R-factor (Eq. S2) and the reduced Chi<sup>2</sup> value. The deviation in  $E_0$  ought to be less than or equal to 10 eV. R-factor less than 2 % denotes that the fit is good enough<sup>11</sup> whereas R-factor between 2 and 5 % denotes that the fit is correct within a consistently broad model. The reduced Chi<sup>2</sup> value is used to compare fits as more absorber-backscatter shells are included to fit the data. A smaller reduced Chi<sup>2</sup> value implies a better fit. Similar results were obtained from fits done in  $k$ ,  $q$ , and  $R$ -spaces.

$$R - factor = \frac{\sum_i(\text{difference between data and fit}_i)^2}{\sum_i(\text{data})^2} \quad (\text{S2})$$

The pre-edge area fits were carried out with an error function and a Gaussian function in the Athena<sup>11</sup> software using the peak-fitting function. The formulas for the error(erf) and Gaussian function employed for the pre-edge fits are shown in equations S3 and S4.

Error function:

$$A \left[ \text{erf} \left( \frac{e - E_0}{w} \right) + 1 \right] \quad (\text{S3})$$

Gaussian function:

$$\left( \frac{A}{w\sqrt{2\pi}} \right) \exp \left[ -\frac{(e - E_0)^2}{(2w^2)} \right] \quad (\text{S4})$$

Where A corresponds to the amplitude; w, the width;  $E_0$ , the centroid of the pre-edge and near edge peaks and e, the x-ray energy.

The parameters  $E_0$ , A and w used for each sets of functions are tabulated below (Table S5).

**DFT Calculations.** The DFT optimization calculations were performed using the ORCA (Version 5.0.4) program package developed by Neese<sup>12</sup> and co-workers. The geometry optimizations were carried out using the solid-state (XRD) as a starting point. The calculations were carried out using the BP86 exchange-correlation functional<sup>13</sup> in combination with the triple zeta valance polarization functions (def2-TZVP),<sup>14</sup> the continuum-like polarizable model (CPCM) model with acetonitrile as a solvent, and the atom-pairwise dispersion correction with the Becke-Johnson damping scheme (D3BJ).<sup>15</sup>

The RI<sup>16</sup> approximation were used to accelerate Coulomb and exchange integrals for the ground and excited state calculations respectively. The default GRID settings were further used for the self-consistent field iterations and for the final energy evaluation. The calculated structures were confirmed to be minima based on a check of the energies and the absence of imaginary frequencies from frequency calculations carried out on the optimized geometries. DFT calculations of both the initial and oxidized form of the Cu complex are shown in Table S4 and Appendix. In order to calculate the electron density differences between **1** and **1-ox**, the optimized geometry and parameters of **1** were used to perform a single-point energy calculation on **1-ox**. The total electron densities of **1** and **1-ox** were subsequently attained through Multiwfn: A Multifunctional Wavefunction Analyzer program package developed by

Lu and co-workers<sup>1</sup> and subtracted and visualized from one another with the Chemcraft software (Table S7).

**Time-dependent (TD)-DFT XANES Calculations.** Time-dependent DFT (TD)-DFT calculations for the optical and XANES spectra of the Cu complexes were carried out using the hybrid-DFT functional B3LYP. The TD-DFT XANES simulations were in this case performed with the B3LYP<sup>17</sup> as functional with the def2-TZVP triple-zeta<sup>17</sup> basis sets together with the D3BJ dispersion correction effects with dense integration grids and the CPCM model. The def2-TZVP/J auxiliary basis set was also employed. A broadening of 3 eV was applied to all XANES calculated spectra and shifted by +194.5 eV relative to experimental spectra. Up to 50 and 150 roots were calculated for the optical and XANES spectra, respectively.

**Table S3.** EXAFS Fits parameters.

| Sample      | Fit | Reg ion | Shell,N                          | R, Å                                      | E <sub>0</sub> | ss. <sup>2</sup> (10 <sup>-3</sup> )  | R-factor      | Reduced Chi-square |
|-------------|-----|---------|----------------------------------|-------------------------------------------|----------------|---------------------------------------|---------------|--------------------|
| <b>1</b>    | 1   | I       | Cu-N,4                           | 1.94                                      | 2.8            | 3.4                                   | 0.0054        | 345                |
|             | 2   | I,II    | Cu-N, 4<br>Cu-C/O, 8<br>Cu-C, 12 | 1.95<br>2.87<br>3.11                      | 5.0            | 3.4<br>16<br>1.9                      | 0.0061        | 189                |
| <b>3</b>    |     | I,II    | Cu-N, 4                          | <b>1.94</b>                               | <b>3.6</b>     | <b>3.5</b>                            | <b>0.0043</b> | <b>184</b>         |
|             |     |         | Cu/O, 1                          | <b>2.35</b>                               |                | <b>9.4</b>                            |               |                    |
|             |     |         | Cu-C/O, 8                        | <b>2.86</b>                               |                | <b>19</b>                             |               |                    |
|             |     |         | Cu-C, 12                         | <b>3.11</b>                               |                | <b>1.9</b>                            |               |                    |
| <b>1-ox</b> | 4   | I       | Cu-N,5                           | 1.95                                      | 2.7            | 5.5                                   | 0.0157        | 953                |
|             | 5   | I,II    | Cu-N, 4                          | 1.96                                      | 3.6            | 4.5                                   | 0.0774        | 1277               |
|             |     |         | Cu/O, 1                          | 2.31                                      |                | 4.9                                   |               |                    |
|             |     |         | Cu-C/O, 8                        | 2.82                                      |                | 8.4                                   |               |                    |
|             |     |         | Cu-C, 12                         | 3.16                                      |                | 3.3                                   |               |                    |
|             | 6   | I,II    | Cu-N, 5<br>Cu-C/O, 8<br>Cu-C, 12 | <b>1.96</b><br><b>2.86</b><br><b>3.09</b> | <b>5.0</b>     | <b>5.8</b><br><b>14</b><br><b>1.2</b> | <b>0.0157</b> | <b>467</b>         |

\* The amplitude reduction factor S0<sup>2</sup> was fixed to 1. Region I refers to the EXAFS spectra region between apparent distances 1.2 -2 Å, Regions I ,II refer to that between 1.2-3 Å. We note that the data resolution, the ability to distinguish between 2 bond distances, given by  $\pi/2\Delta k$  is  $\sim 0.126$  Å.

**Table S4.** Summary of the bond distances of **1** and **1-ox**, derived from EXAFS, XRD, and DFT analysis Bond distances are in Å.

| Complexes | EXAFS (Å)                                       | XRD (Å)                             | DFT (Å)                                                                          |
|-----------|-------------------------------------------------|-------------------------------------|----------------------------------------------------------------------------------|
| <b>1</b>  | Cu-N ( <b>4</b> ):<br>1.94<br>Cu-O( <b>1</b> ): | Cu-N: 1.91982, 1.91215,<br>1.92887, | Cu-N: 1.93181, 1.95127,<br>1.95686, 1.94610<br><b>Cu-N<sub>avg</sub> = 1.947</b> |



|             |                            |                                                                   |                                                                                                                            |
|-------------|----------------------------|-------------------------------------------------------------------|----------------------------------------------------------------------------------------------------------------------------|
|             | 2.35                       | <b>Cu-N<sub>avg</sub> = 1.919</b><br>Cu-O (Perchlorate) = 2.41869 | Cu-O (Perchlorate) = 2.44430                                                                                               |
| <b>1-ox</b> | Cu-N ( <b>5</b> ):<br>1.96 |                                                                   | Cu-N: 1.96855, 1.97209,<br>1.98871, 1.98035<br>Cu-N (bound acetonitrile) =<br>2.06838<br><b>Cu-N<sub>avg</sub> = 1.996</b> |

**Table S5.** Pre-edge parameter fits for **1** and **1-ox**.

| <b>1</b>             |                   |           |       |
|----------------------|-------------------|-----------|-------|
| Function             | Centroid          | Amplitude | Width |
| Erf                  | 8983.5            | 0.090     | 3.2   |
| Gauss                | 8979.4            | 0.105     | 1.8   |
| <b>Pre-edge area</b> | <b>10.5 units</b> |           |       |
| <b>1-ox</b>          |                   |           |       |
| Function             | Centroid          | Amplitude | Width |
| Erf                  | 8984.04           | 0.090     | 3.2   |
| Gauss                | 8979.4            | 0.100     | 1.8   |
| <b>Pre-edge area</b> | <b>10.0 units</b> |           |       |

The pre-edge area peaks fitting were further re-carried out in the Fityk<sup>18</sup> software and as previously demonstrated<sup>19</sup>, and the same pre-edge peak areas of 10.5, and 10.0 units were obtained for **1**, and **1-ox**, respectively, thus confirming the fit procedure employed in the Athena<sup>9</sup> software.

## Synthesis

H<sub>2</sub>L<sub>1</sub>-d<sub>5</sub> was synthesized as described in Scheme S1, and similar experimental conditions were followed as described for the preparation of H<sub>2</sub>L<sub>1</sub>.<sup>1</sup> Nitrobenzene-d<sub>5</sub> was synthesized from benzene-d<sub>6</sub> by using HNO<sub>3</sub>/H<sub>2</sub>SO<sub>4</sub> as the oxidant according to the literature procedure.<sup>20</sup> Aniline-d<sub>5</sub> was further synthesized by reducing nitrobenzene-d<sub>5</sub> by Sn/HCl using the same procedure as for the reduction of natural nitrobenzene.

**6-(2-methyl-1,3-dioxolan-2-yl)-N-(6-(2-methyl-1,3-dioxolan-2-yl)pyridin-2-yl)-N-(phenyl-d<sub>5</sub>)pyridin-2-amine (P3):** Yield: 83 % (1.45 g). <sup>1</sup>H NMR (CDCl<sub>3</sub>, 500MHz): δ 1.6 (s, 6H, CH<sub>3</sub>), 3.88 (m, 4H, CH<sub>2</sub>), 3.99 (m, 4H, CH<sub>2</sub>), 7.01 (d, 2H, ArH), 7.11 (d, 2H, ArH), 7.51 (t, 2H, ArH). <sup>13</sup>C NMR (CDCl<sub>3</sub>, 100MHz): δ 24.46, 65.19, 108.6, 113, 115.7, 137.5, 157.3, 158.9. ESI-MS [C<sub>24</sub>H<sub>20</sub>D<sub>5</sub>N<sub>3</sub>O<sub>4</sub> + H<sup>+</sup>]: 425.2232 (calculated), 425.2215 (observed). IR (KBr, cm<sup>-1</sup>): 3440 (br), 2986 (s), 2882 (s), 2933 (s), 1571 (s), 1440 (s), 1323 (s), 1196 (s), 1036 (s), 950 (s), 876 (s), 803 (s), 742 (s), 566 (m).

**1,1'-(((phenyl-d<sub>5</sub>)azanediy)bis(pyridine-6,2-diyl))bis(ethan-1-one) (P4):** Yield: 90% (1.06 g). <sup>1</sup>H NMR (CDCl<sub>3</sub>, 500MHz): δ 2.4 (s, 6H, CH<sub>3</sub>), 7.31 (d, 2H, ArH), 7.68-7.33 (m, 4H, ArH).

$^{13}\text{C}$  NMR ( $\text{CDCl}_3$ , 100MHz):  $\delta$  25.57, 115.6, 119.7, 137.92, 151.69, 156.69, 200.19. ESI-MS [ $\text{C}_{20}\text{H}_{12}\text{D}_5\text{N}_3\text{O}_2 + \text{Na}^+$ ]: 359.1527 (calculated), 359.1523 (observed). IR (KBr,  $\text{cm}^{-1}$ ): 3434 (br), 2925 (m), 2885 (br), 1690 (s), 1575 (s), 1439 (s), 1331 (m), 1250 (s), 1159 (s), 1156 (s), 954 (s), 805 (s), 728 (s), 593 (s), 551 (m).

**(1E,1'E)-1,1'-(((phenyl-d5)azanediyl)bis(pyridine-6,2-diyl))bis(ethan-1-one) dioxime ( $\text{H}_2\text{L}_1-d_5$ ):** Yield: 77% (0.82 g).  $^1\text{H}$  NMR (dmso- $d_6$ , 500MHz):  $\delta$  1.9 (s, 6H,  $\text{CH}_3$ ), 6.96 (d, 2H, ArH), 7.46 (d, 2H, ArH), 7.67 (t, 2H, ArH), 11.42 (s, 2H, NOH).  $^{13}\text{C}$  NMR (dmso- $d_6$ , 100MHz):  $\delta$  10.54, 114.1, 115.98, 138.47, 153.19, 154.74, 156.77. ESI-MS [ $\text{C}_{20}\text{H}_{14}\text{D}_5\text{N}_5\text{O}_2 + \text{H}^+$ ]: 367.1926 (calculated), 367.1918 (observed). IR (KBr,  $\text{cm}^{-1}$ ): 3233(br), 2922 (m), 1739 (br), 1566 (s), 1446 (s), 1363 (m), 1296 (m), 1158 (s), 1014 (s), 921 (s), 800 (s), 728 (s), 679 (m), 550 (m).

**$N^1$ ,  $N^3$ -bis(2-acetylphenyl)-2,2-diethylmalonamide (P5):** 1-(2-aminophenyl)ethan-1-one (1g, 7.4 mmol) was dissolved in dry diethyl ether, and the solution was stirred at 0 °C in ice bath. Then 2,2-diethylmalonyl dichloride (728.9 mg, 3.7 mmol) was added dropwise into the solution. After 5 min, triethylamine (2.25 g, 22.2 mmol) was added to it. The reaction mixture was stirred for 12 h. The solvent was evaporated, and 10 % HCl solution was added to the residue. The aqueous solution was extracted with DCM, the organic layer was collected and dried over  $\text{Na}_2\text{SO}_4$ . The product was purified with column chromatography using hexane: ethyl acetate (10:4) to yield a yellowish solid. % yield = 72% (2.1 g, 5.3 mmol).  $^1\text{H}$  NMR ( $\text{CDCl}_3$ , 500MHz):  $\delta$  0.98 (t, 6H,  $\text{CH}_3$ ), 2.3 (q, 4H,  $\text{CH}_2$ ), 2.67 (s, 6H,  $\text{COCH}_3$ ), 7.13 (t, 2H, ArH), 7.56 (t, 2H, ArH), 7.9 (d, 2H, ArH), 8.84 (d, 2H, ArH), 12.18 (s, 2H, NH).  $^{13}\text{C}$  NMR ( $\text{CDCl}_3$ , 100 MHz):  $\delta$  8.82, 25.25, 28.48, 62.18, 121.25, 122.41, 122.55, 131.51, 135.03, 140.75, 171.67, 202.55. ESI-MS [ $\text{C}_{23}\text{H}_{26}\text{N}_2\text{O}_4 + \text{Na}^+$ ]: 417.1785 (calculated), 417.1776 (observed).

**2,2-diethyl- $N^1$ ,  $N^3$ -bis(2-((E)-1-(hydroxyimino)ethyl)phenyl)malonamide ( $\text{H}_4\text{L}_2$ ):** Precursor P5 (200mg, 0.507mmole), hydroxylammonium chloride (70.46mg, 1.014mmole) and pyridine (79.1 mg, 1.014mmole) were dissolved in EtOH and the mixture was refluxed at 80 °C for 12 hrs. Then the solvent was evaporated, and water was added to the residue. The aqueous solution was extracted with DCM, the organic layer was collected and dried over  $\text{Na}_2\text{SO}_4$ . The product was purified with the column chromatography using hexane: ethyl acetate (10:3) to yield a brownish solid. % yield = 88% (189 mg, 0.445 mmol).  $^1\text{H}$  NMR ( $\text{CDCl}_3$ , 500MHz):  $\delta$  0.90 (t, 6H,  $\text{CH}_3$ ), 2.1 (q, 4H,  $\text{CH}_2$ ), 2.19 (s, 6H,  $\text{COCH}_3$ ), 7.11 (t, 2H, ArH), 7.33 (t, 2H, ArH), 7.42 (d, 2H, ArH), 8.38 (d, 2H, ArH), 8.53 (s, 2H, OH), 12.55 (s, 2H, NH).  $^{13}\text{C}$  NMR ( $\text{CDCl}_3$ , 100MHz):  $\delta$  8.07, 12.54, 24.22, 61.51, 121.52, 123.52, 123.83, 128.30, 129.48, 136.66, 156.85, 171.67. ESI-MS [ $\text{C}_{23}\text{H}_{28}\text{N}_4\text{O}_4 + \text{Na}^+$ ]: 447.2003 (calculated), 447.2000 (observed).

**[Cu<sup>II</sup>(HL<sub>1</sub>)(ClO<sub>4</sub>)]•CH<sub>3</sub>CN (1).** A methanolic solution of (3 mL) of Cu (ClO<sub>4</sub>)<sub>2</sub>•6H<sub>2</sub>O (0.185 g, 0.5 mmol) was slowly added to a stirring solution of H<sub>2</sub>L<sub>1</sub> (0.183 g, 0.5 mmol) in 3 mL of methanol. The reaction mixture was allowed to stir at room temperature for ~1 h. The resulting reaction solvent was evaporated to dryness. The complex was purified by crystallization by diffusing diethyl ether into an acetonitrile solution of the complex at room temperature. Yield: 47 % (0.123 g). Anal. Calcd for C<sub>20</sub>H<sub>18</sub>CuN<sub>5</sub>O<sub>2</sub>ClO<sub>4</sub>•CH<sub>3</sub>CN, (564.44 g/mol): C, 46.81; H,

3.75; N, 14.89, Found: C, 46.83; H, 3.64; N, 15.97. IR (KBr,  $\text{cm}^{-1}$ ): 3437 (br), 1591(m), 1440 (s), 1369 (s), 1274(s), 1112 (s), 1092 (s), 796 (m), 709 (m), 626 (s). ESI-MS (positive ion mode, MeOH):  $m/z = 423.0739$  (LCu +  $\text{H}^+$ ). UV-Vis (in MeCN):  $\lambda$ , nm ( $\epsilon$ ,  $\text{M}^{-1} \text{cm}^{-1}$ ): 312 (4989), 517(378), 574 (338).

Complex **1-d<sub>5</sub>** was synthesized following the same procedure as mentioned above.

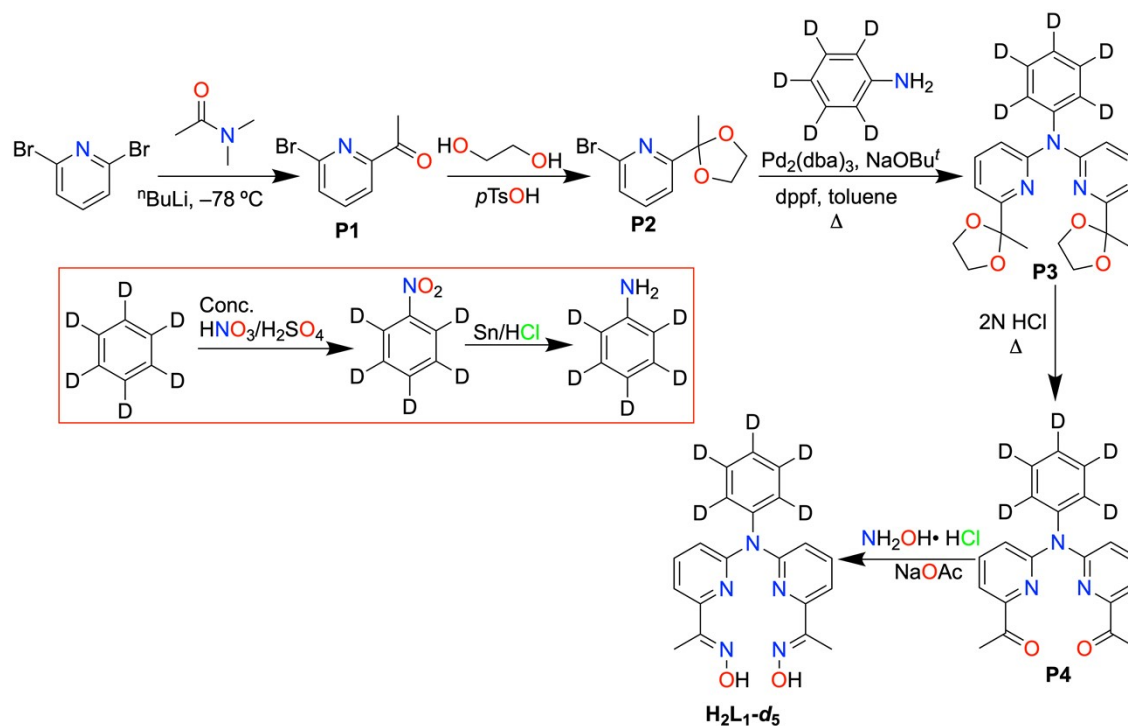

**Scheme S1.** Synthesis of **H<sub>2</sub>L<sub>1</sub>-d<sub>5</sub>**.

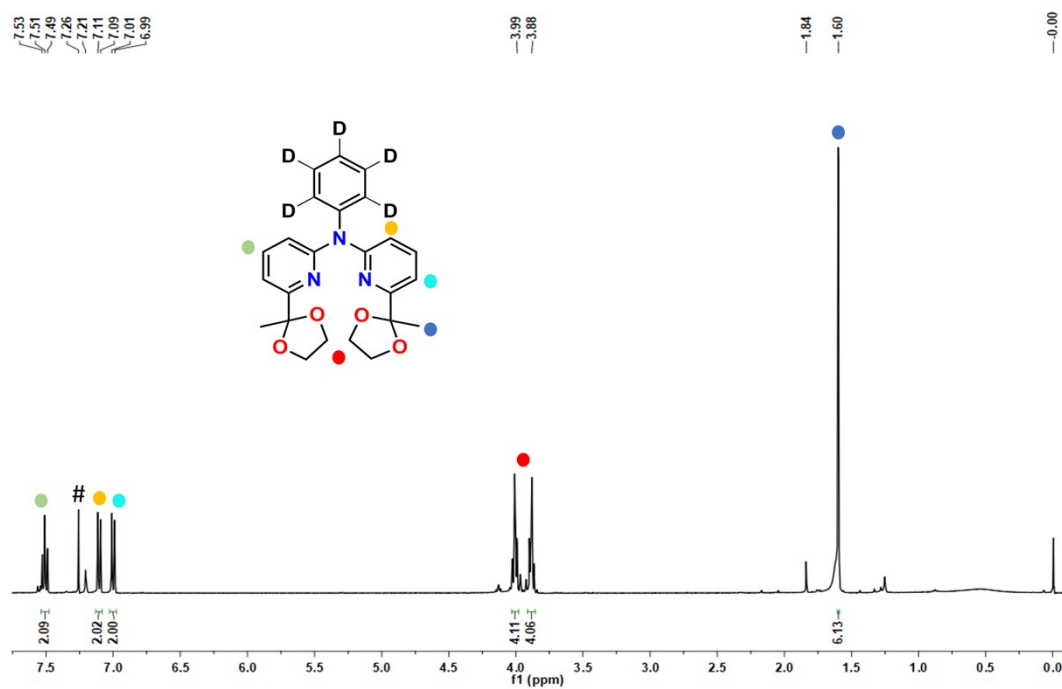

**Figure S1.** The  $^1\text{H-NMR}$  spectrum of **P3** (400 MHz, 25 °C) in  $\text{CDCl}_3$ .

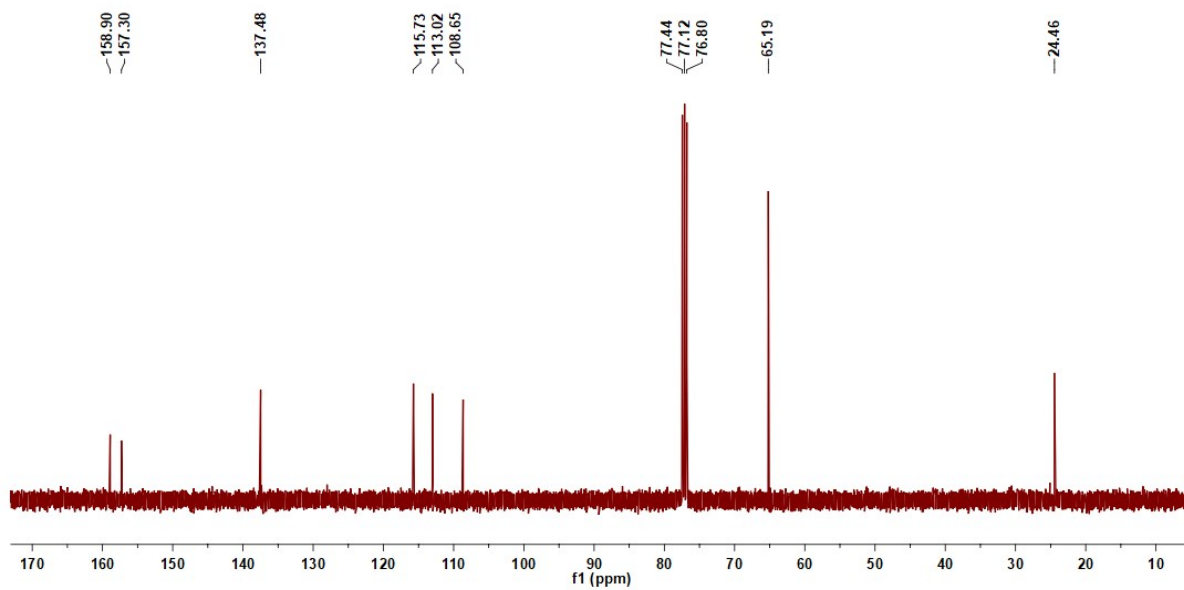

**Figure S2.** The  $^{13}\text{C NMR}$  spectrum of **P3** (101 MHz,  $\text{CDCl}_3$ ) at 25 °C.

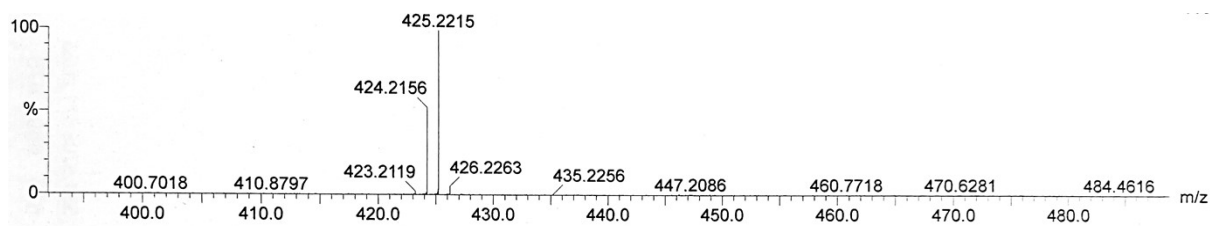

**Figure S3.** The ESI-mass spectrum of precursor **P3** in methanol. [ $C_{24}H_{20}D_5N_3O_4 + H^+$ : 425.2232 (calculated), 425.2215 (observed)]. Calculated  $m/z$  for  $[P3 + H]^+$  ( $C_{24}H_{20}D_5N_3O_4 + H^+$ ) = 425.2237; observed  $m/z$  = 425.2215.

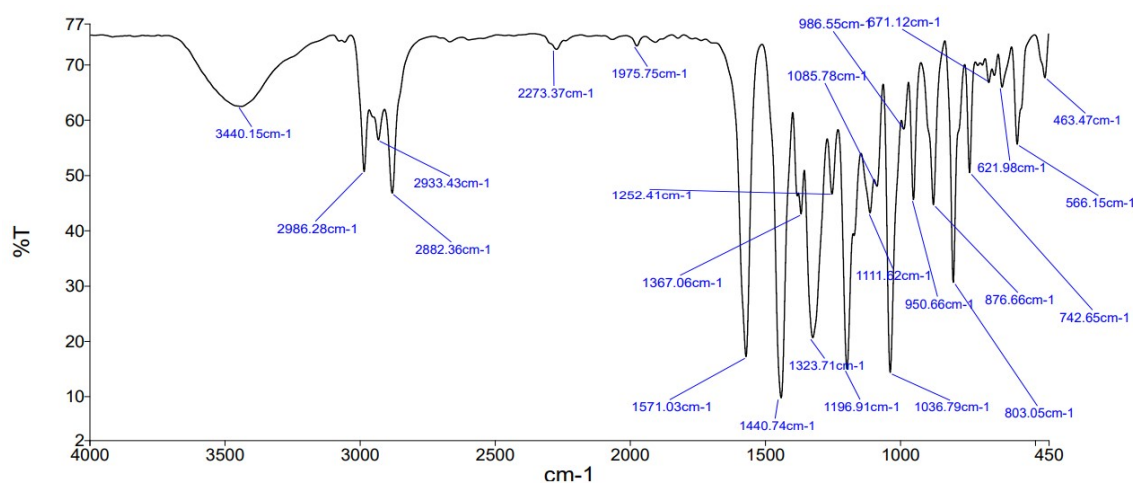

**Figure S4.** The FT-IR spectrum of **P3** was recorded on the KBr pellet.

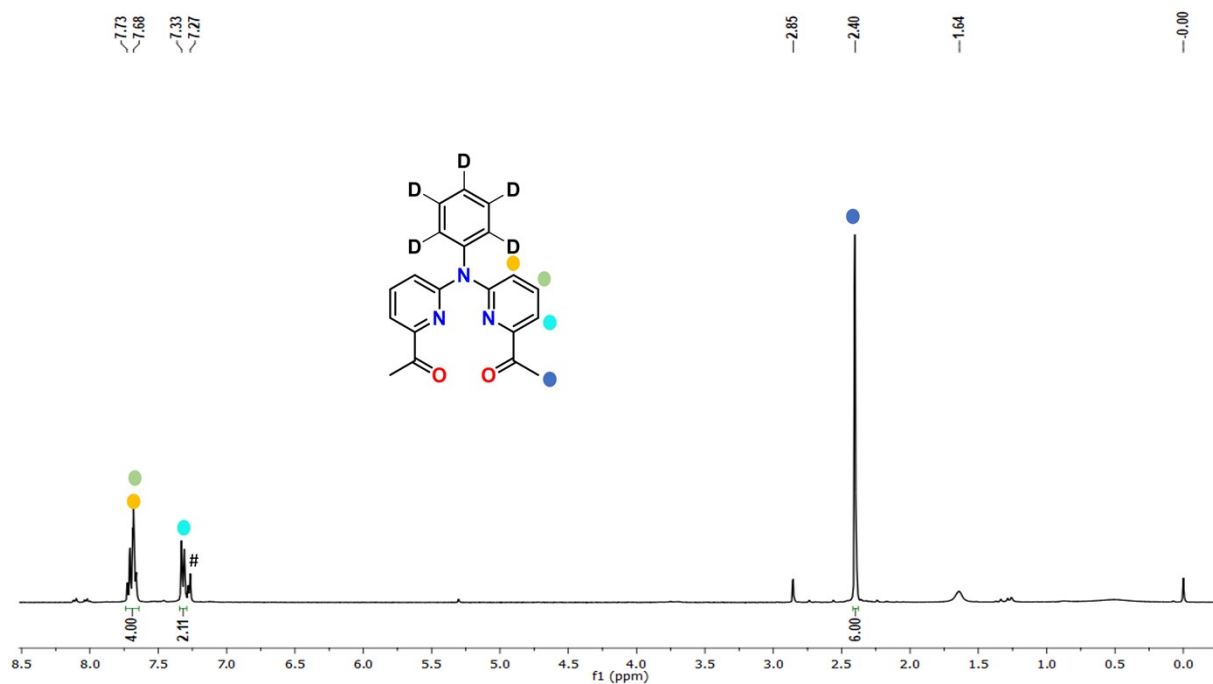

**Figure S5.** The  $^1H$ -NMR spectrum of **P4** in  $CDCl_3$  was recorded in a 400 MHz NMR instrument at 25 °C.

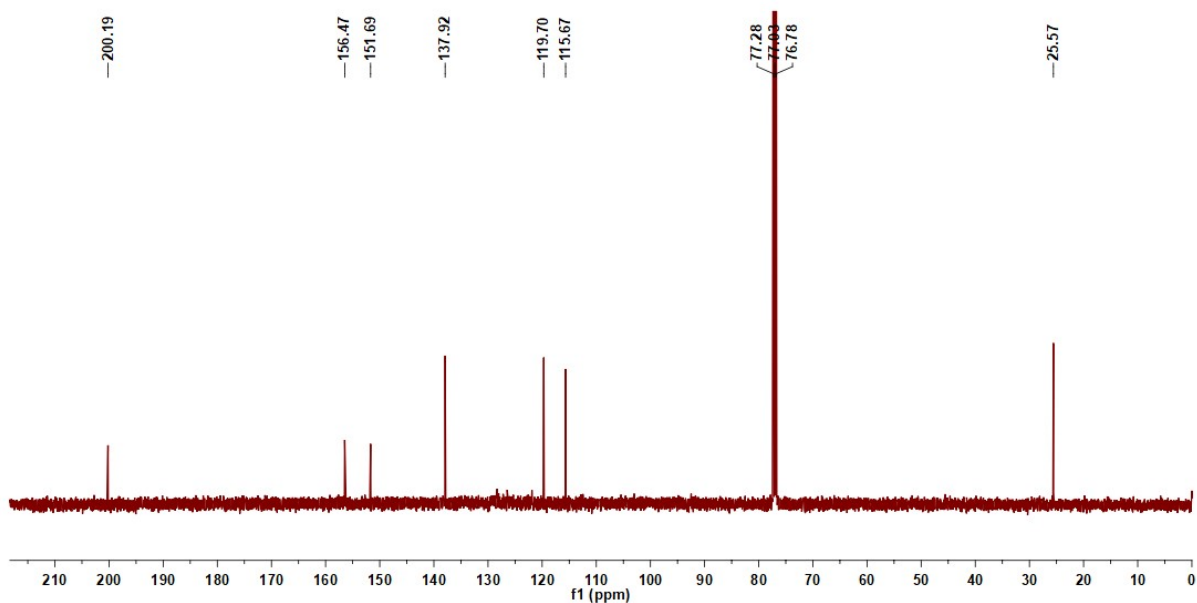

**Figure S6.** The  $^{13}\text{C}$  NMR spectrum of **P4** (101 MHz,  $\text{CDCl}_3$ ) at 25 °C.

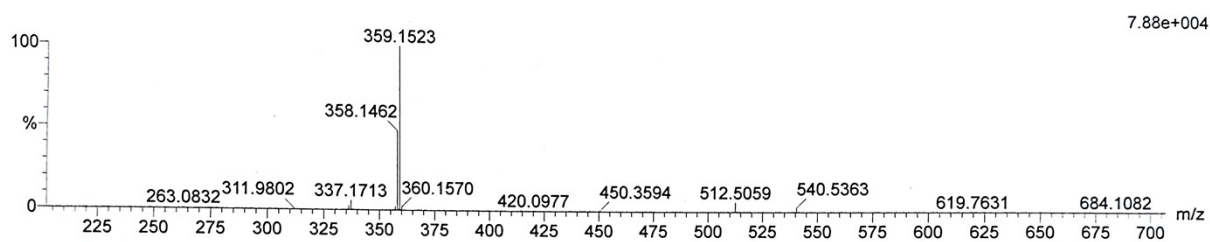

**Figure S7.** The ESI-mass spectrum of **P4** in methanol. Calculated  $m/z$  for  $[\text{P4} + \text{Na}]^+$  ( $\text{C}_{20}\text{H}_{12}\text{D}_5\text{N}_3\text{O}_2 + \text{Na}^+$ ) = 359.1532; observed  $m/z$  = 359.1523.

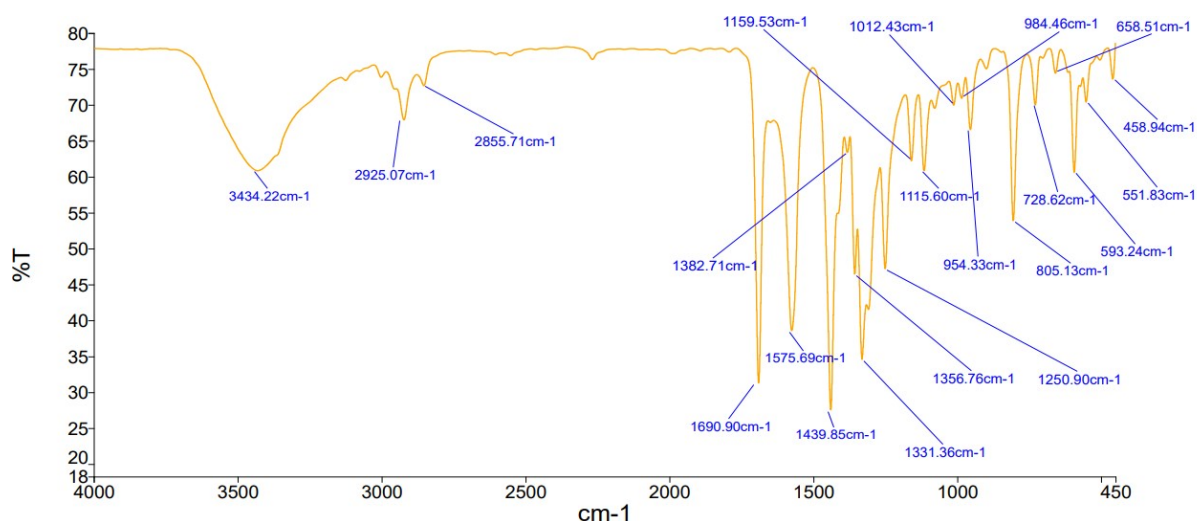

**Figure S8.** The FT-IR spectrum of **P4** was recorded on KBr pellet.

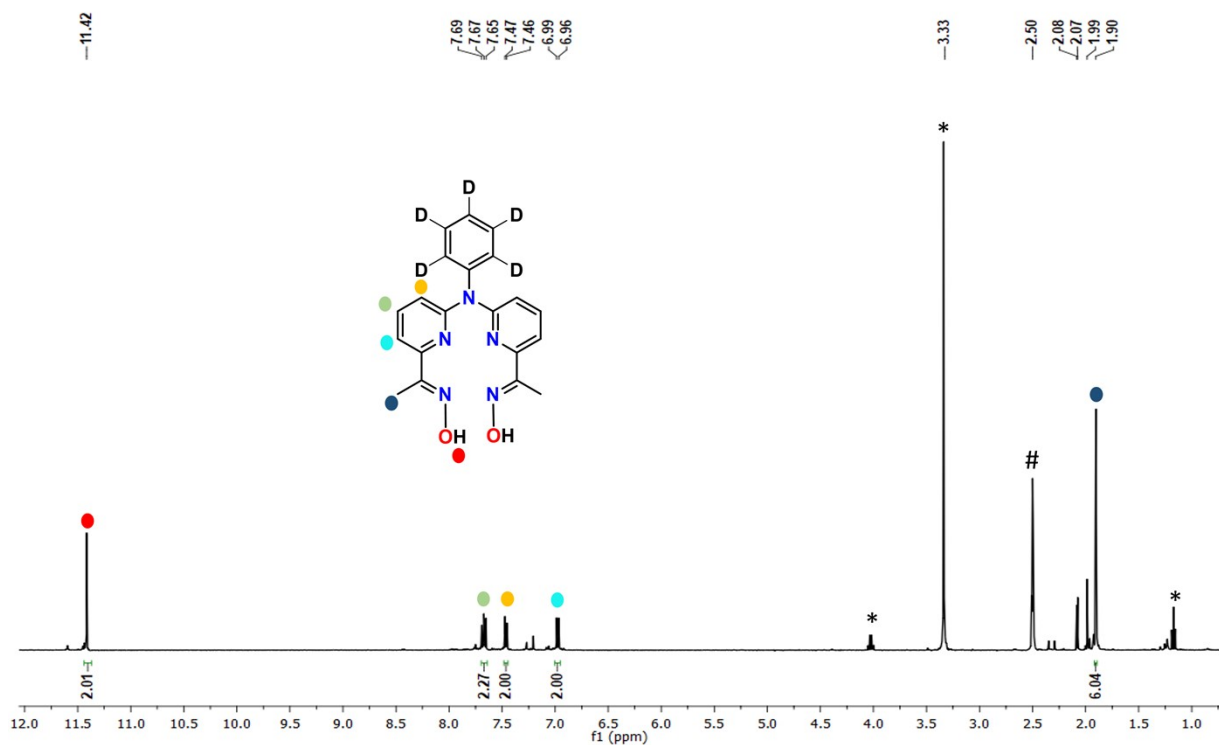

**Figure S9.** The  $^1H$ -NMR of  $H_2L_1-d_5$  recorded in  $DMSO-d_6$  in a 400 MHz NMR instrument at 25 °C. [\* indicates solvent molecules]

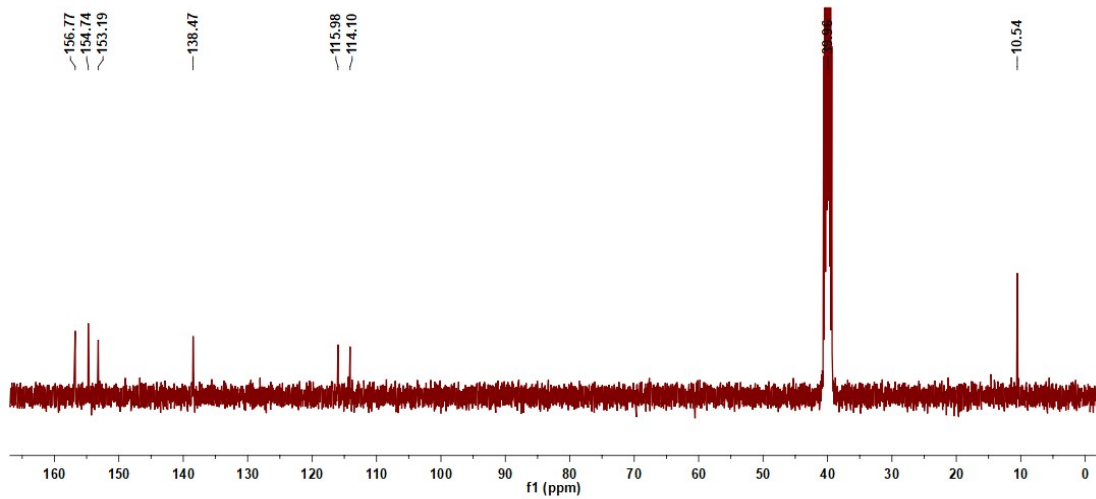

**Figure S10.** The  $^{13}C$  NMR spectrum (101 MHz, in  $DMSO-d_6$ ) of  $H_2L_1-d_5$  at 25 °C.

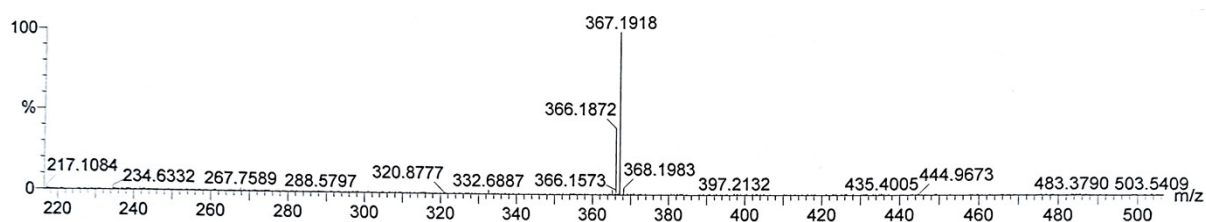

**Figure S11.** The ESI-mass spectrum of  $H_2L_1-d_5$  in methanol. Calculated  $m/z$  for  $[HL_1-d_5 + H]^+$  ( $C_{20}H_{18}D_5N_5O_2 + H^+$ ) = 367.1931; observed  $m/z$  = 367.1918.

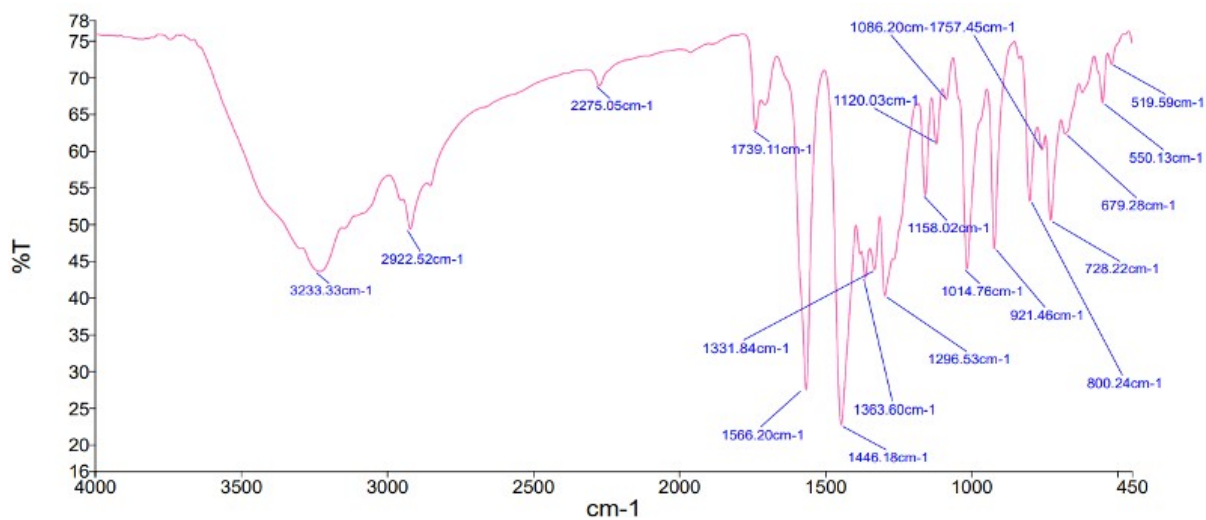

**Figure S12.** The FT-IR spectrum of  $H_2L_1-d_5$  was recorded on a KBr pellet.



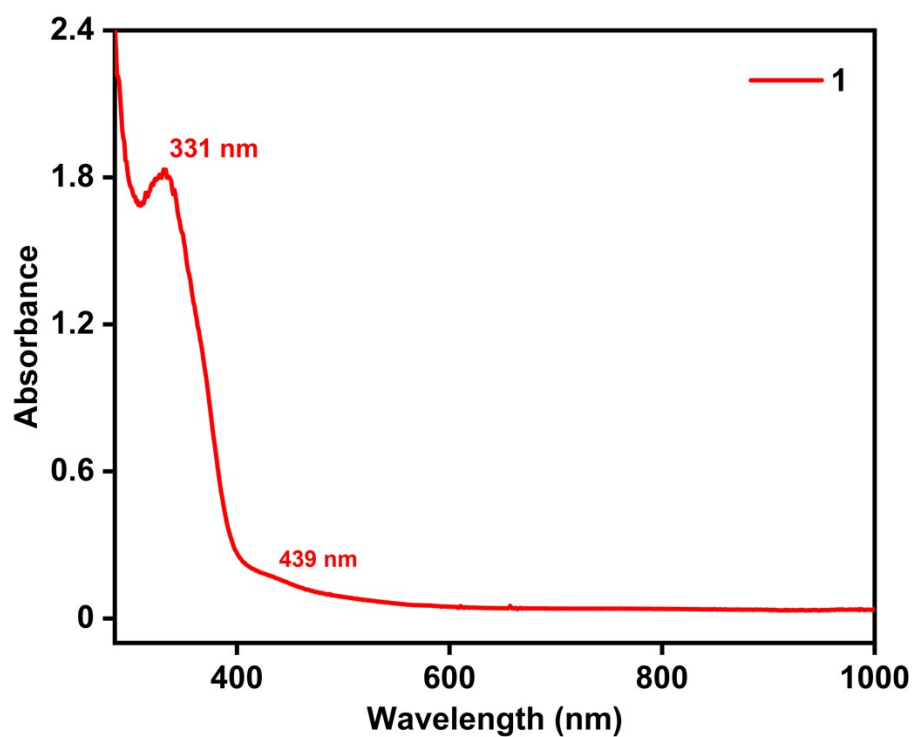

**Figure S13.** UV-vis spectrum of **1** (0.15 mM) in methanol at 25 °C.

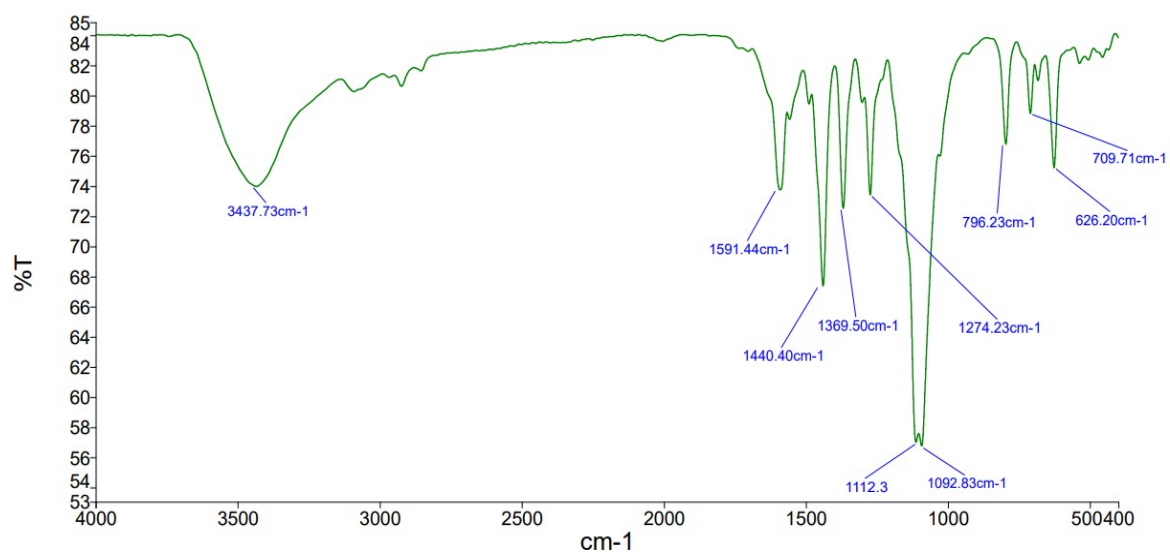

**Figure S14.** The FT-IR spectrum of **1** was recorded on the KBr pellet.

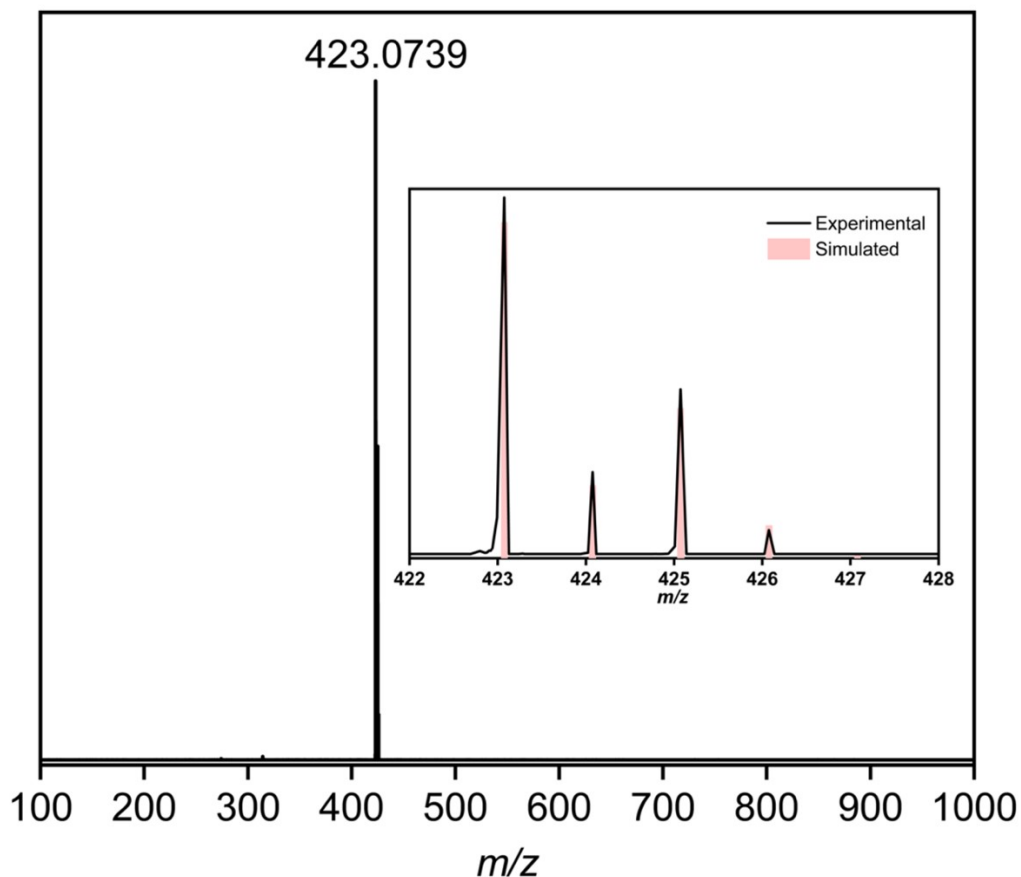

**Figure S15.** The ESI-mass spectrum of **1** was recorded in methanol. The inset Figure shows the experimentally obtained and theoretical isotope distribution pattern of the complex. Calculated  $m/z$  for  $(HL_1)Cu]^+$  ( $C_{20}H_{18}CuN_5O_2$ ) = 423.0756; observed  $m/z$  = 423.0739.

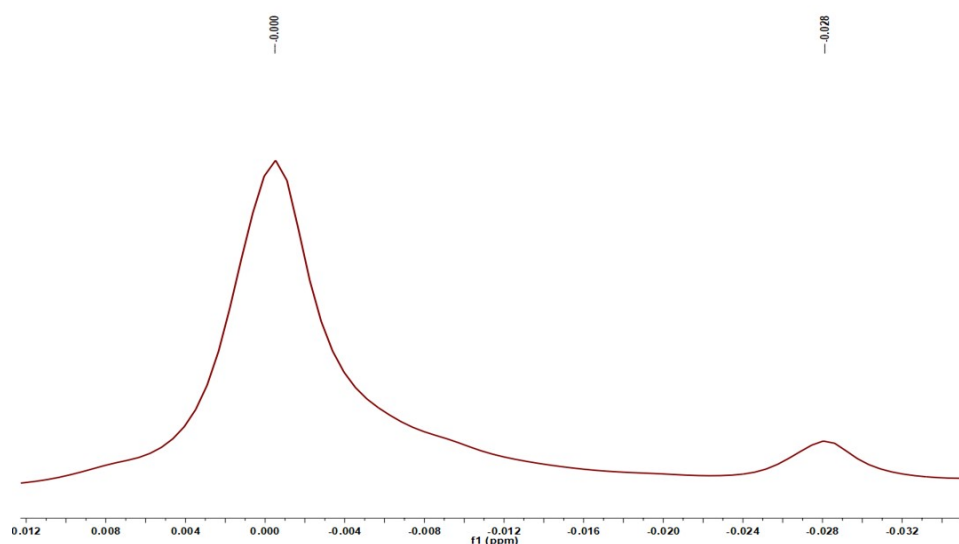

**Figure S16.** Measurement of the effective magnetic moment ( $\mu_{\text{eff}}$ ) of **1** (7.26 mM) in methanol- $d_4$  by Evans' method.  $^1\text{H}$ -NMR was recorded in a 400 MHz instrument at 25 °C using hexamethyldisiloxane as an internal standard.  $\mu_{\text{eff}}$  value was calculated using the difference of chemical shift of the internal standard.

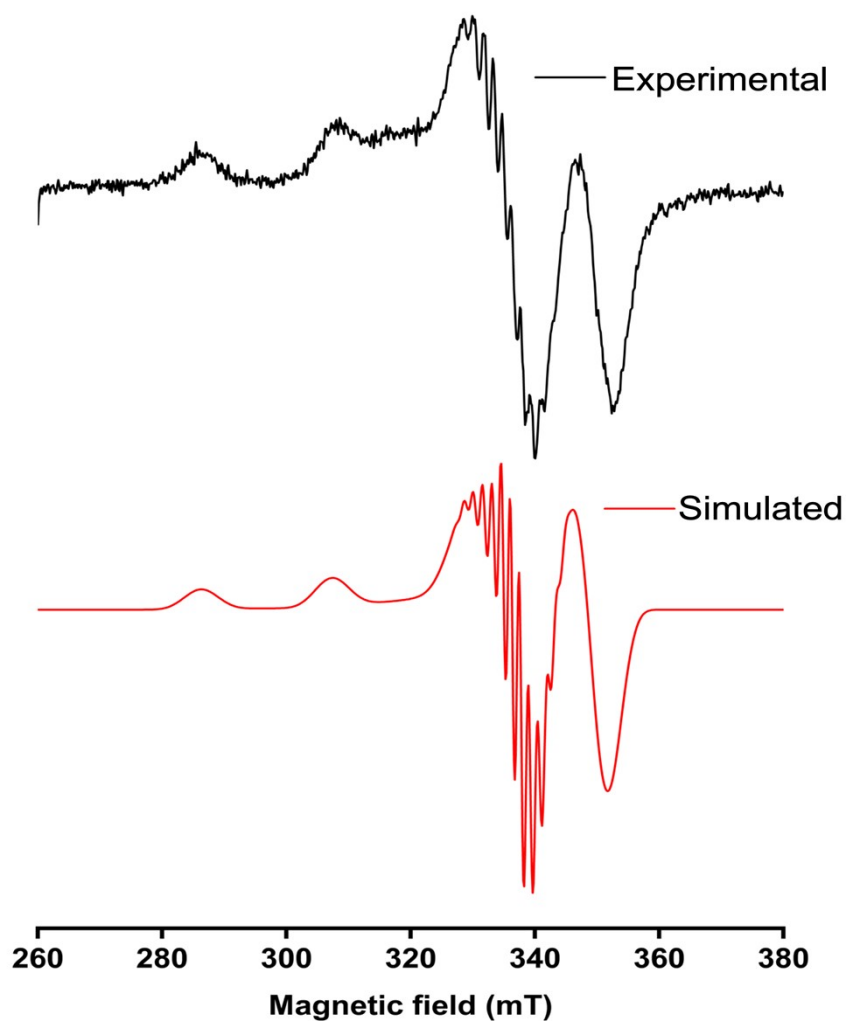

**Figure S17.** X-band EPR spectrum of **1** (2 mM) at 77 K (methanol) and its computer-simulated spectrum. EPR measurement experimental conditions: Frequency = 9.628961 GHz, Power = 2.01 mW, Modulation frequency = 100 kHz, Modulation amplitude = 4.91 G.

Simulated parameters: 2.045 ( $g_x$ ), 2.09 ( $g_y$ ), and 2.165 ( $g_z$ ); 20 G ( $A^{\text{Cu}_x}$ ), 30 G ( $A^{\text{Cu}_y}$ ), 210 G ( $A^{\text{Cu}_z}$ ), 14 G ( $A^{\text{N}_x}$ ), 15.3 G ( $A^{\text{N}_y}$ ), 13 G ( $A^{\text{N}_z}$ )

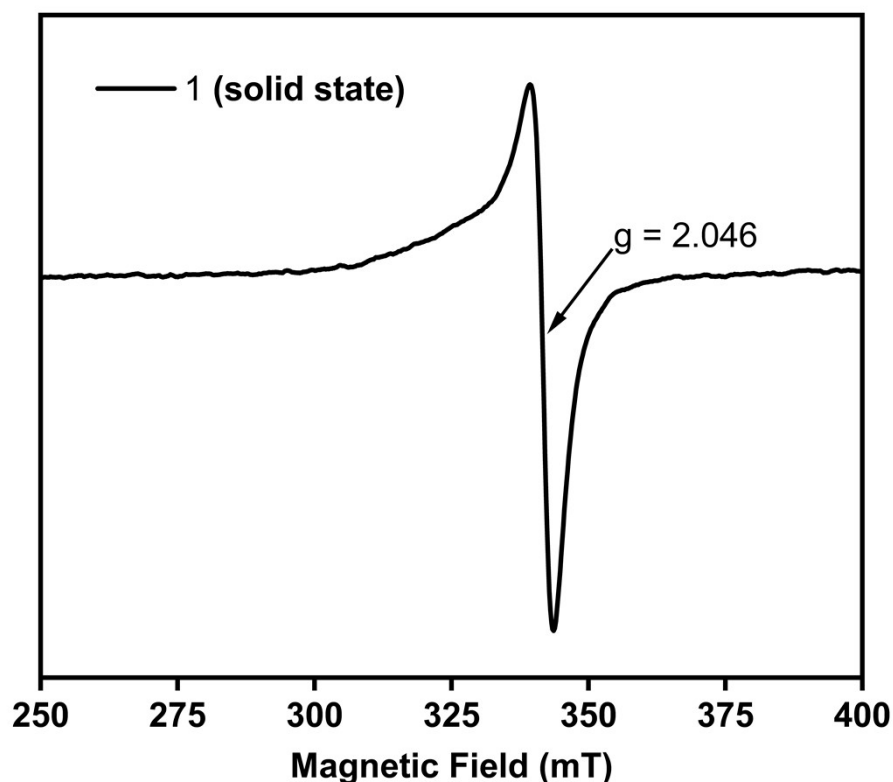

**Figure S18.** X-band EPR spectrum of **1** at room temperature. EPR measurement experimental conditions: Frequency = 9.783718 GHz, Power = 3.88 mW, Modulation frequency = 100 kHz, Modulation amplitude = 0.5 G.

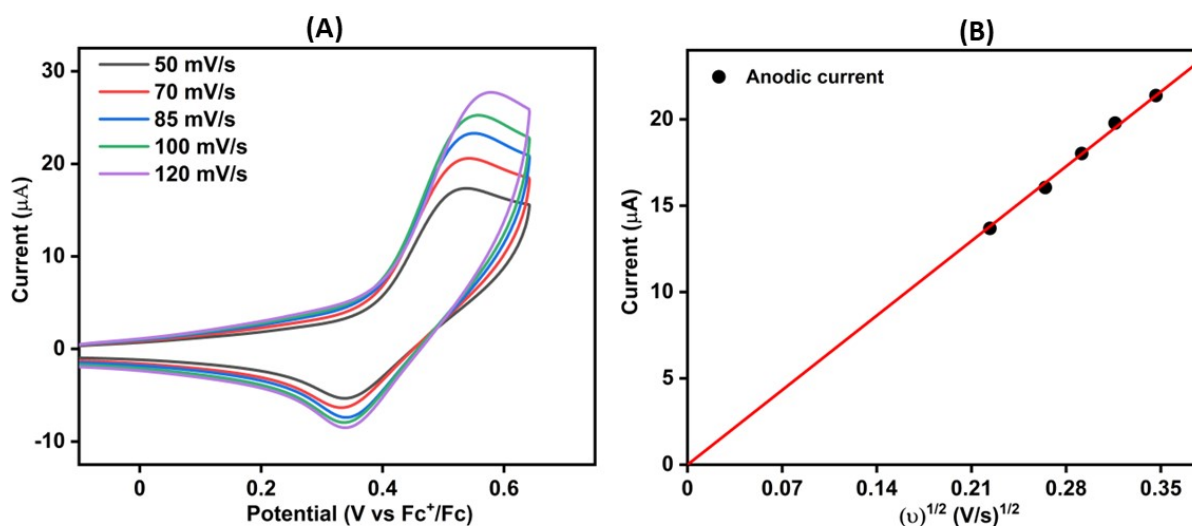

**Figure S19.** CV of **1** (0.5 mM) at different scan rates in methanol. The data was recorded using a glassy carbon working electrode, Pt wire counter electrode, and Ag/AgCl in saturated KCl as the reference electrode. Potential values were converted to  $\text{Fc}^+/\text{Fc}$  couple. (B). A plot of anodic/cathodic current vs.  $v^{1/2}$ .

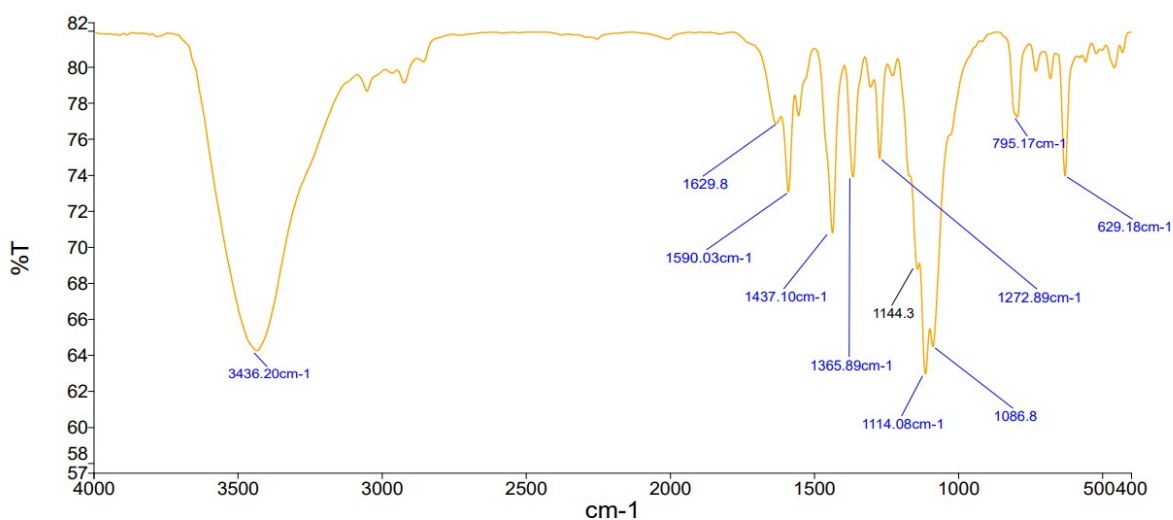

**Figure S20.** The FT-IR spectrum of 1-d<sub>5</sub> was recorded on the KBr pellet.

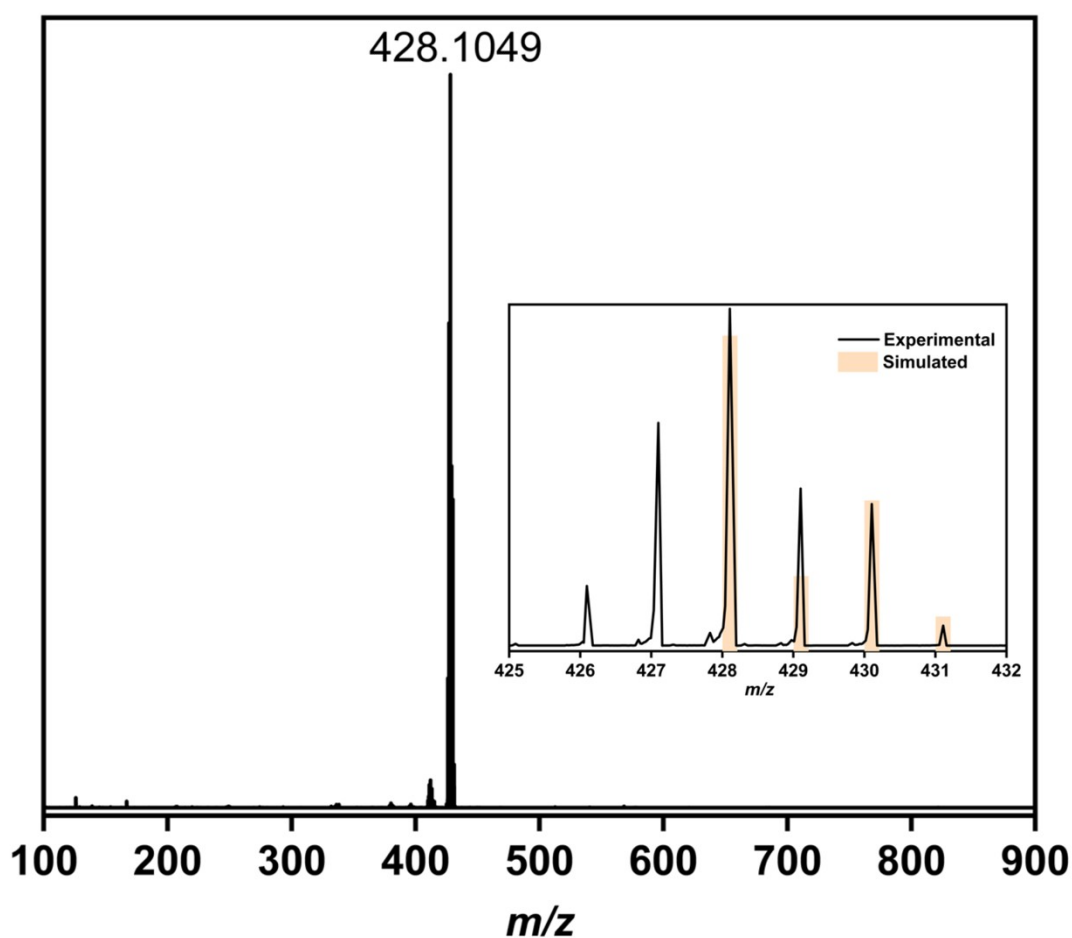

**Figure S21.** The ESI-mass spectrum of 1-d<sub>5</sub> was recorded in methanol. The inset Figure shows the experimentally obtained and theoretical isotope distribution pattern of the complex. Calculated  $m/z$  for  $(HL_1-d_5)Cu]^+$  ( $C_{20}H_{13}D_5CuN_5O_2$ ) = 428.1070; observed  $m/z$  = 428.1049. The peaks observed at 427.0996 and 426.0937 likely correspond to the fragmentation of the parent peak.

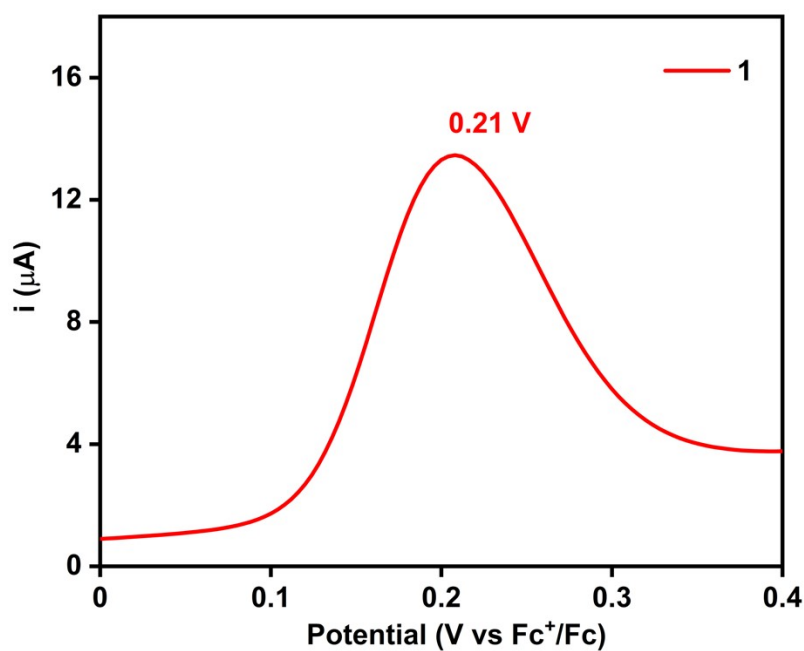

**Figure S22.** DPV of **1** in acetonitrile at 25 °C. A glassy carbon working electrode and Pt wire counter electrode were used during the measurements. An excess of  $n\text{Bu}_4\text{NClO}_4$  was used as the supporting electrolyte.

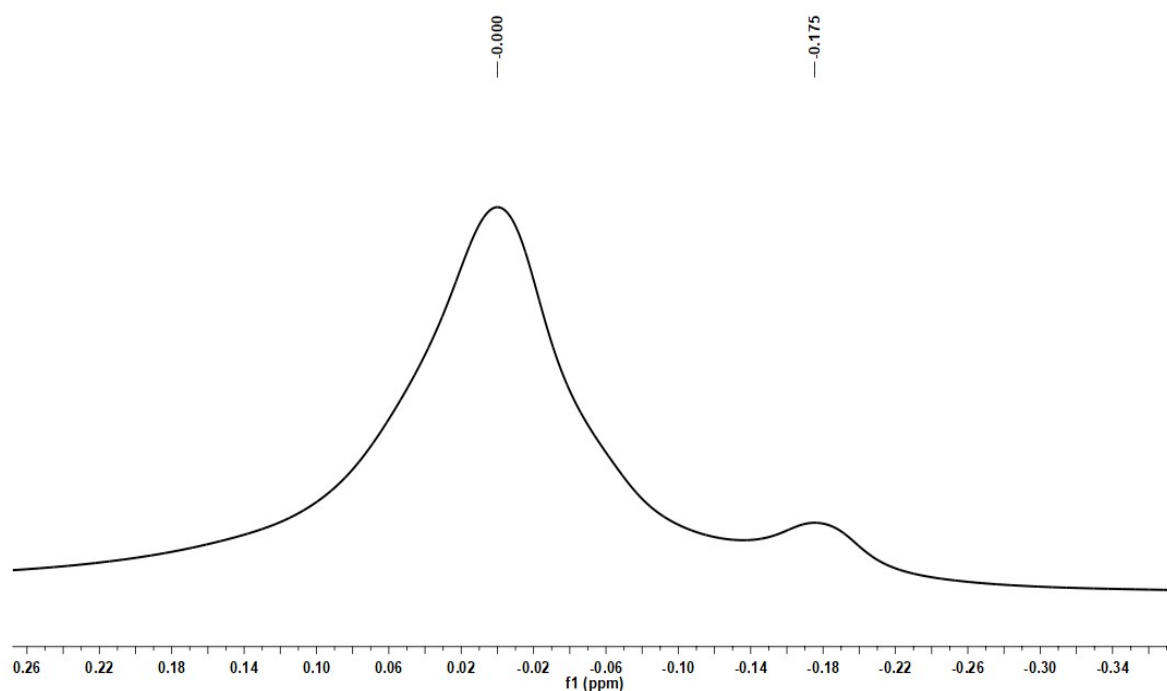

**Figure S23.** Measurement of the effective magnetic moment ( $\mu_{\text{eff}}$ ) of **1-ox** (10.99 mM) in methanol- $d_3$  by Evans' method. The  $^1\text{H}$ -NMR spectrum was recorded in a 400 MHz instrument at  $-40$  °C using hexamethyldisiloxane as an internal standard.  $\mu_{\text{eff}}$  value was calculated using the difference of chemical shift of the internal standard.

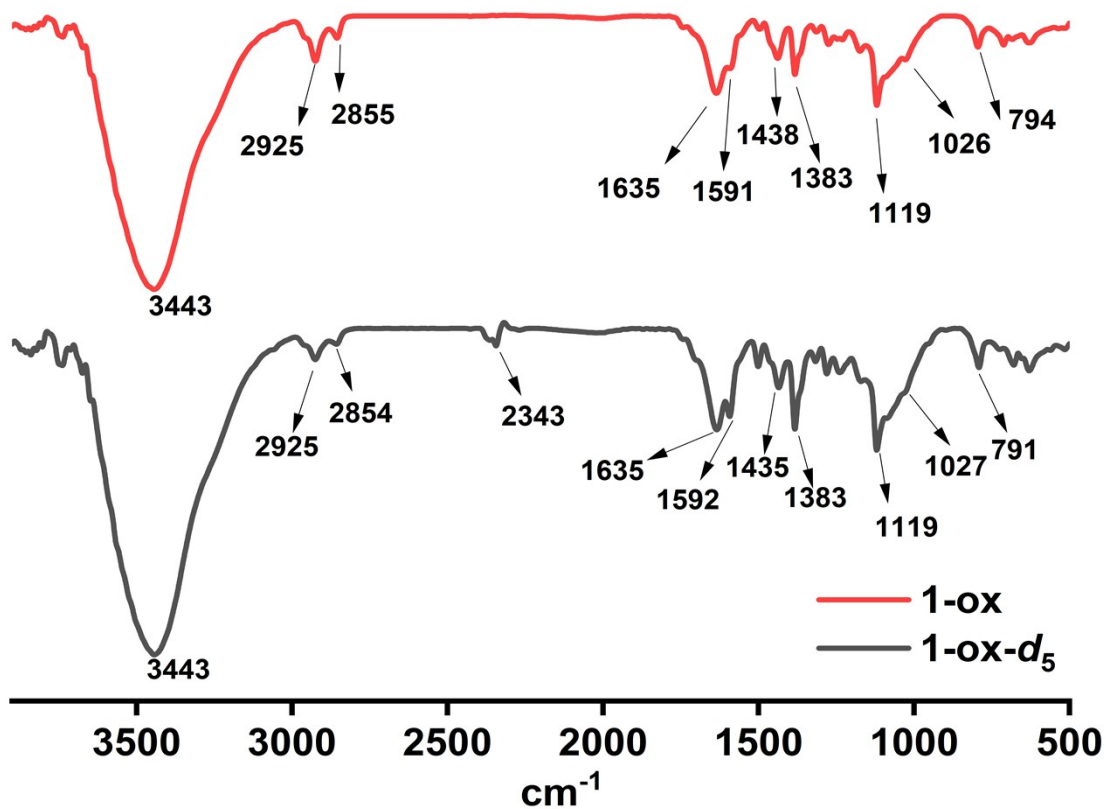

**Figure S24.** The FT-IR spectrum of 1-ox and 1-ox-*d*<sub>5</sub> was recorded on the KBr palette.

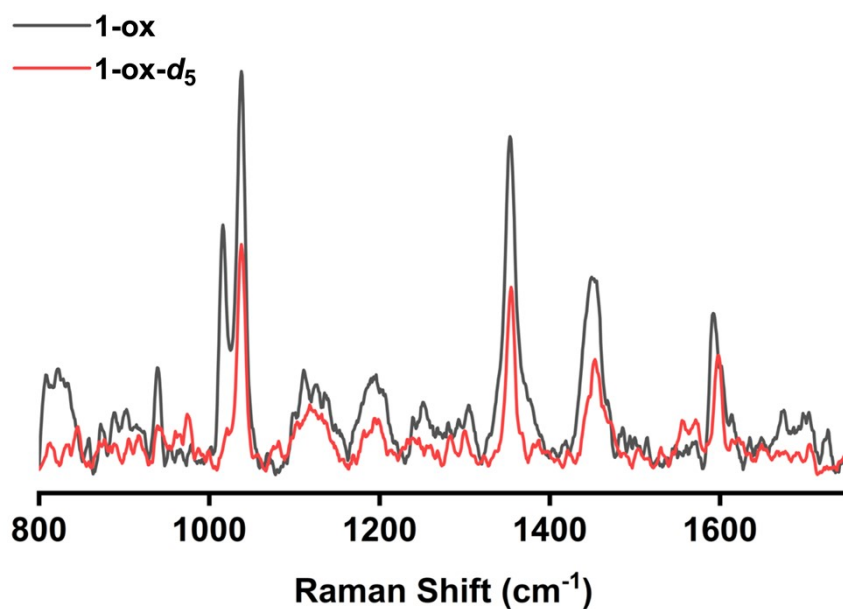

**Figure S25.** Raman spectrum of 1-ox and 1-ox-*d*<sub>5</sub> in methanol was recorded using a 785 nm laser.

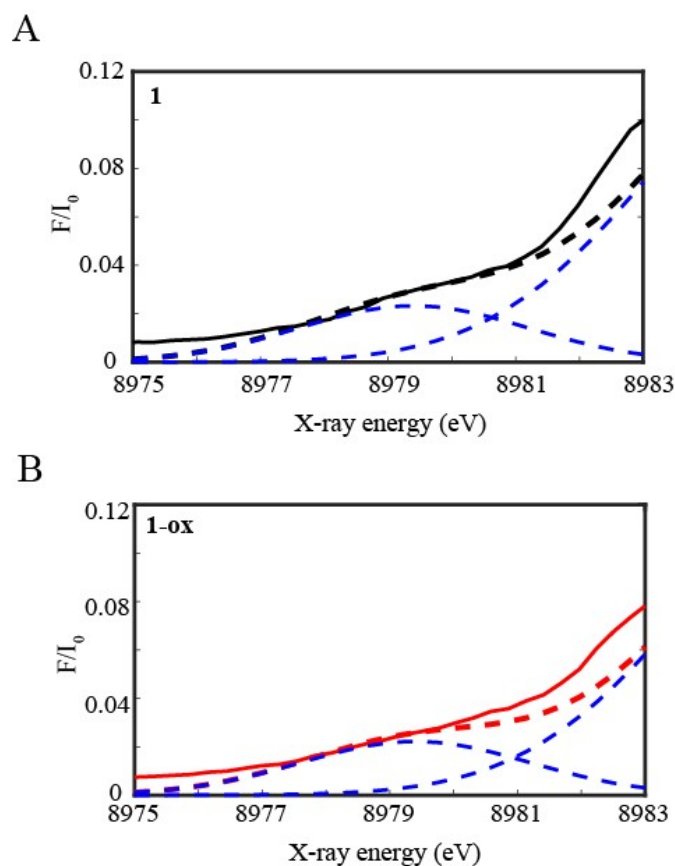

**Figure S26.** Zoom-in of the pre-edge regions together with the respective fits shown in dashed blue of A. **1** and B. **1-ox**. The dashed lines correspond to the step and gaussian functions used to fit the pre-edge peaks whereas the blue dashed line correspond to the summed overall fit.

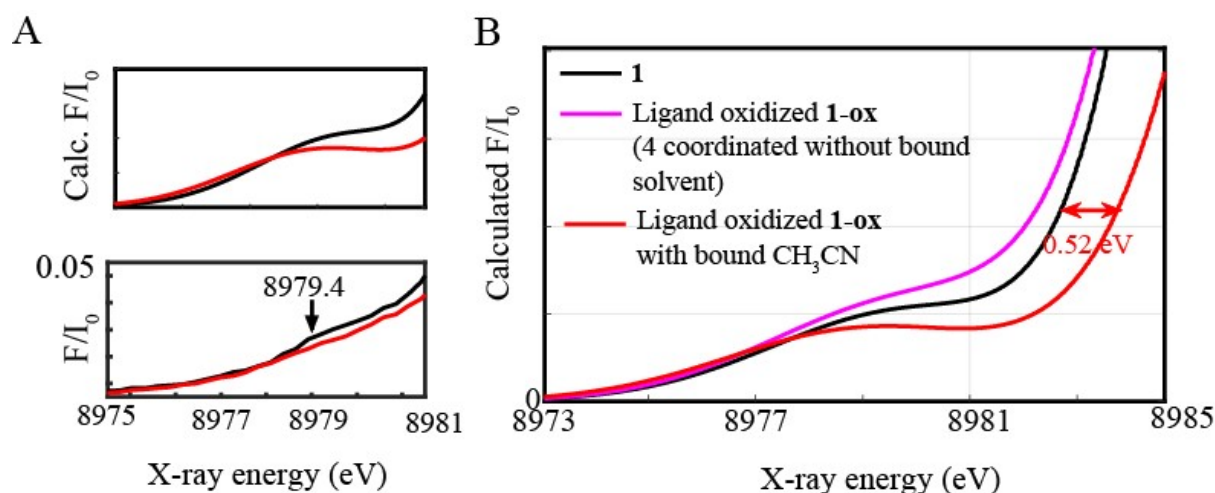

**Figure S27 A.** Zoom-in of the calculated (top) and experimental (bottom) pre-edge regions of **1** (black) and **1-ox** (red) B. Calculated pre-edge and rising edge XANES of calculated models of **1**, 4-coordinated ligand oxidized **1-ox** without bound solvent molecules, Five-coordinated ligand oxidized **1-ox** with a bound acetonitrile molecule.



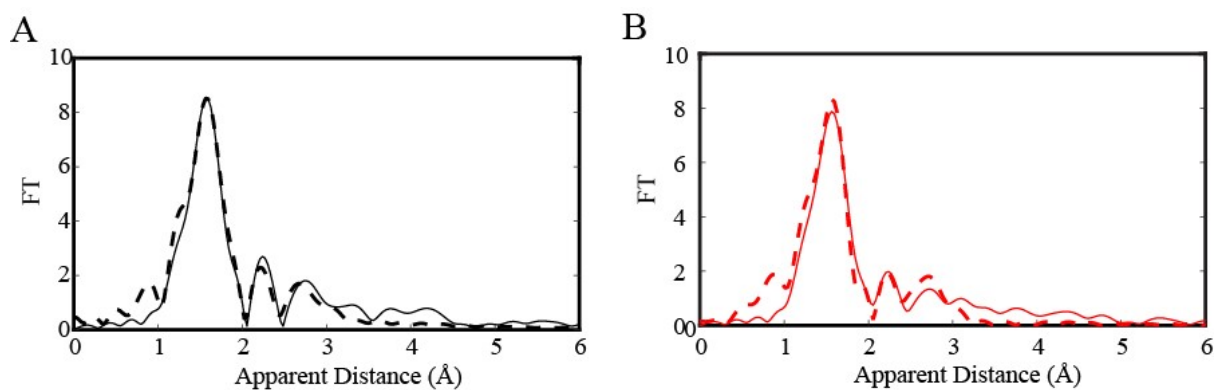

**Figure S28.** Fourier transforms of  $k^3$ -weighted Cu EXAFS for **A. 1** (solid black line) and its corresponding fit (Fit 3, **Table S3**) and **B. Ligand oxidized 1-ox** (solid red line) and its corresponding fit (Fit 6, **Table S3**).

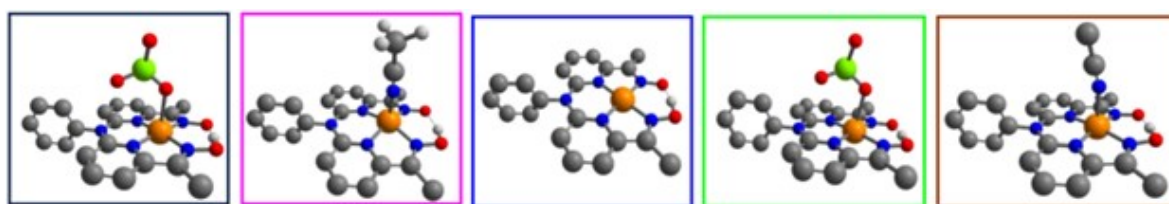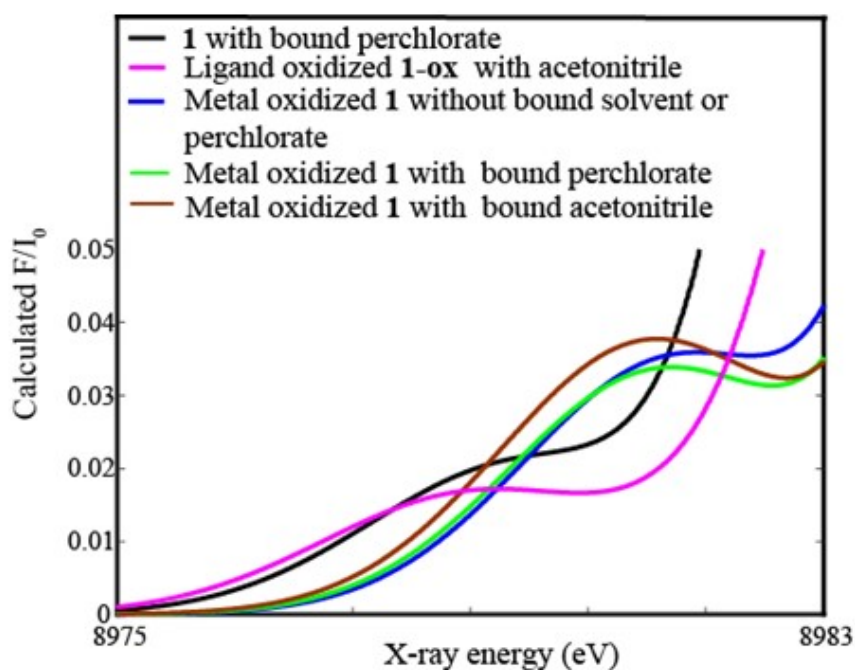

**Figure S29 Top.** Calculated Pre-edge models. Bottom. Calculated pre-edge for **1** (with bound perchlorate), Ligand oxidized **1-ox** (with bound acetonitrile), metal oxidized **1** without bound solvent or perchlorate, metal oxidized **1** with bound acetonitrile, and metal oxidized **1** with bound acetonitrile.

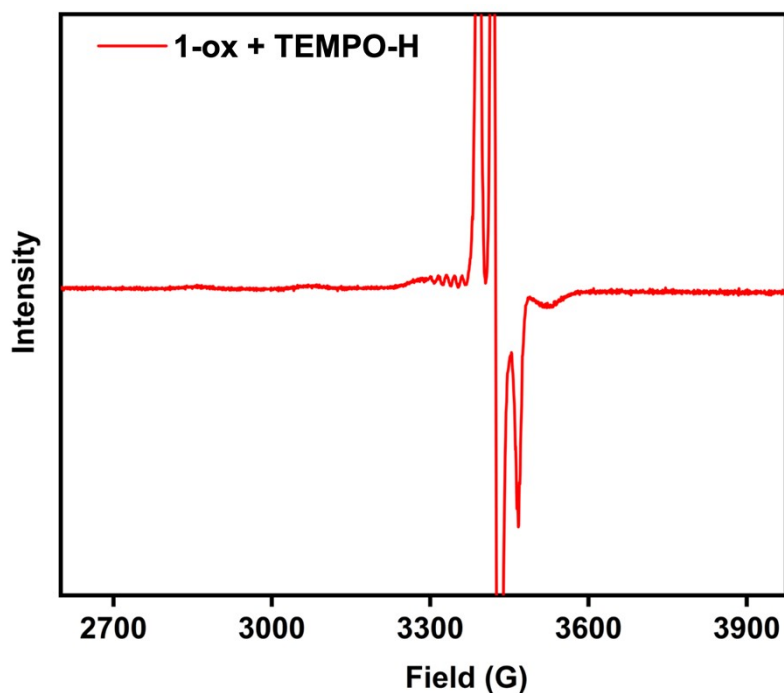

**Figure S30.** The X-band EPR spectrum of the reaction mixture was obtained after the addition of one equivalent TEMPOH to **1-ox** in methanol at  $-40\text{ }^{\circ}\text{C}$ . The EPR data was recorded at the liquid nitrogen temperature.

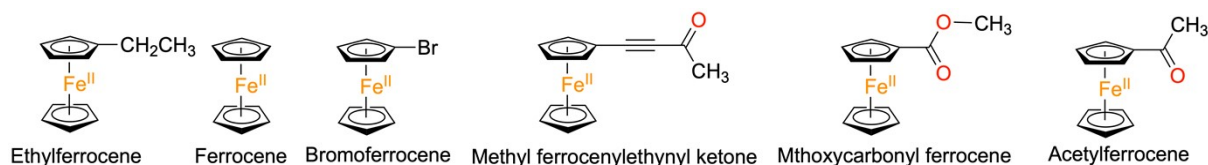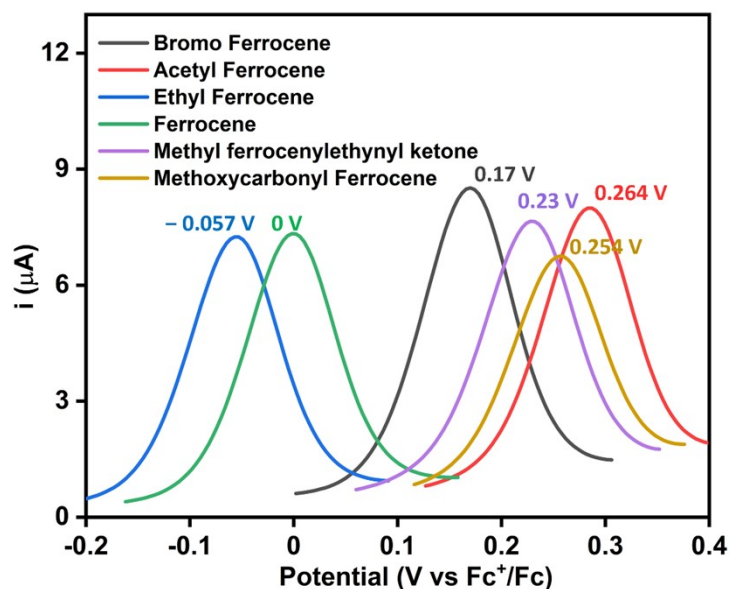

**Figure S31.** DPV data of different ferrocene derivatives showing one-electron oxidation potentials in methanol. The data was recorded in methanol at  $25\text{ }^{\circ}\text{C}$  using a glassy carbon working electrode and Pt wire counter electrode.  $n\text{Bu}_4\text{NClO}_4$  was used as the supporting electrolyte.

**Table S6.** ET rate constant values of **1-ox** at  $-60\text{ }^{\circ}\text{C}$  in methanol. The  $E_{\text{ox}}$  values of the ferrocene derivatives were measured at  $25\text{ }^{\circ}\text{C}$ .

| Substrate                       | $E_{\text{ox}}$ (vs. $\text{Fc}^+/\text{Fc}$ ) | $k_{\text{et}}$ ( $\text{M}^{-1}\text{ s}^{-1}$ ) |
|---------------------------------|------------------------------------------------|---------------------------------------------------|
| Ethylferrocene                  | $-0.05$                                        | $2.5 \times 10^3$                                 |
| Ferrocene                       | $0$                                            | $1.3 \times 10^3$                                 |
| Bromoferrocene                  | $0.17$                                         | $96$                                              |
| Methyl ferrocenylethynyl ketone | $0.23$                                         | $24.3$                                            |
| (methoxycarbonyl) ferrocene     | $0.25$                                         | $20.7$                                            |
| Acetyl ferrocene                | $0.28$                                         | $11$                                              |

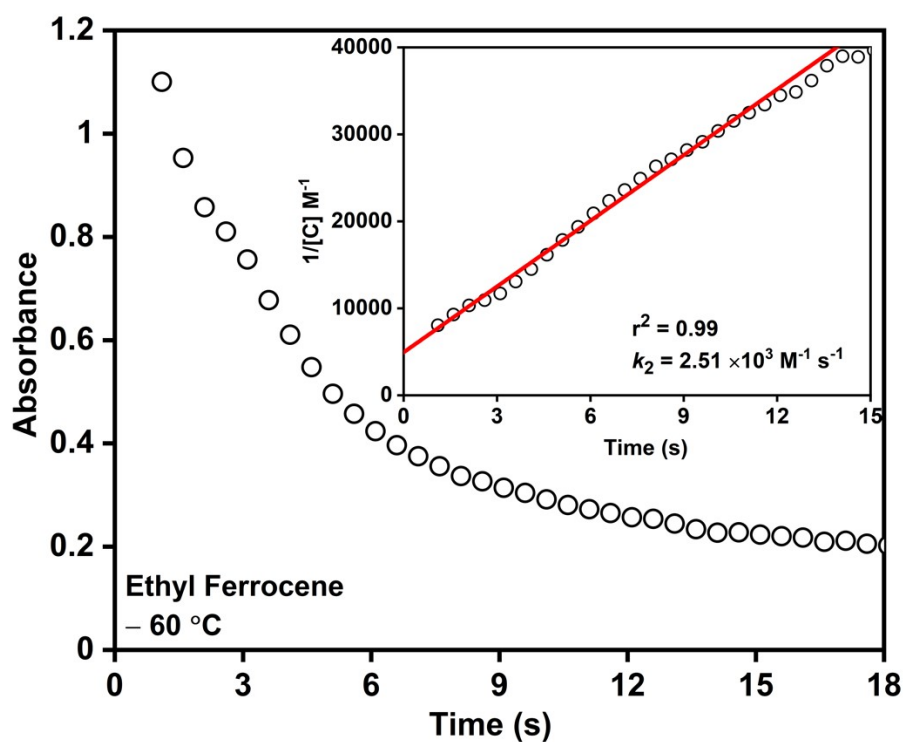

**Figure S32.** Time trace at 543 nm upon addition of one equivalent of ethyl ferrocene to **1-ox** at  $-60\text{ }^{\circ}\text{C}$ . [inset: Plot of  $1/[\mathbf{1-ox}]$  vs. time for determining second order rate constant value at  $-60\text{ }^{\circ}\text{C}$ .]

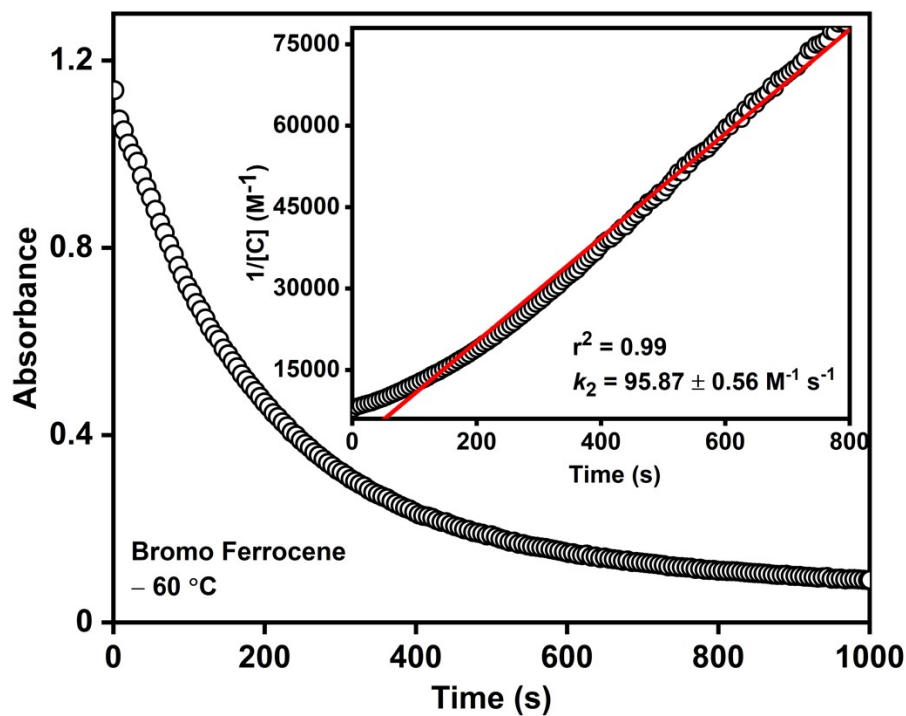

**Figure S33.** Time Trace at 543 nm upon addition of one equivalent of bromo ferrocene to **1-ox** at  $-60\text{ }^{\circ}\text{C}$ . [inset: Plot of  $1/[1\text{-ox}]$  vs. time for determining second order rate constant value at  $-60\text{ }^{\circ}\text{C}$ .]

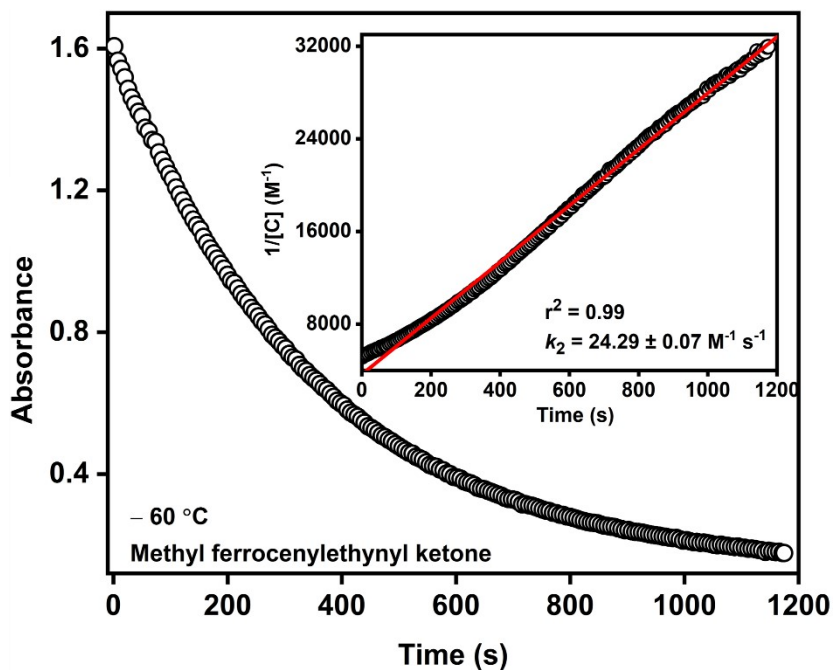

**Figure S34.** Time trace at 543 nm upon addition of one equivalent of methyl ferrocenylethynyl ketone to **1-ox** at  $-60\text{ }^{\circ}\text{C}$ . [inset: Plot of  $1/[1\text{-ox}]$  vs. time for the determination of second order rate constant value at  $-60\text{ }^{\circ}\text{C}$ .]

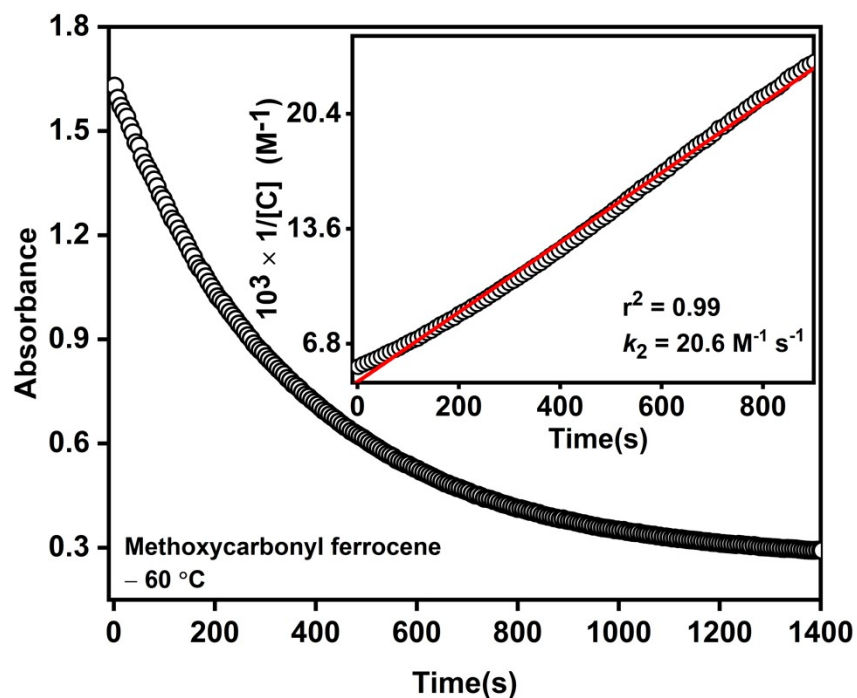

**Figure S35.** Time trace at 543 nm upon addition of one equivalent of (methoxycarbonyl) ferrocene to **1-ox** at  $-60\text{ }^{\circ}\text{C}$ . [inset: Plot of  $1/[1\text{-ox}]$  vs time for determining second order rate constant value at  $-60\text{ }^{\circ}\text{C}$ .]

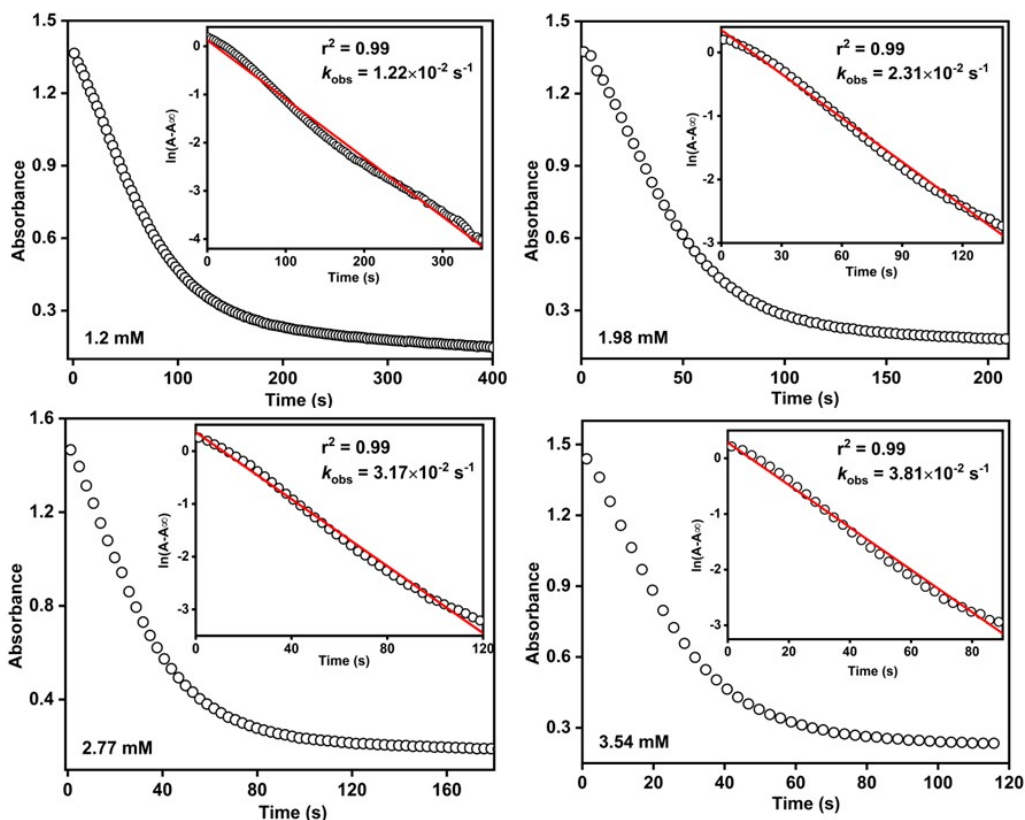

**Figure S36.** Time trace at 543 nm for the reaction of **1-ox** with acetyl ferrocene (1.2 mM, 1.98 mM, 2.77 mM, and 3.54 mM) at  $-60\text{ }^{\circ}\text{C}$ . [inset: Plot of  $\ln(A-A_{\infty})$  vs. time (s) for the determination of pseudo-first-order rate constant ( $k_{\text{obs}}$ ) value at  $-60\text{ }^{\circ}\text{C}$ .]

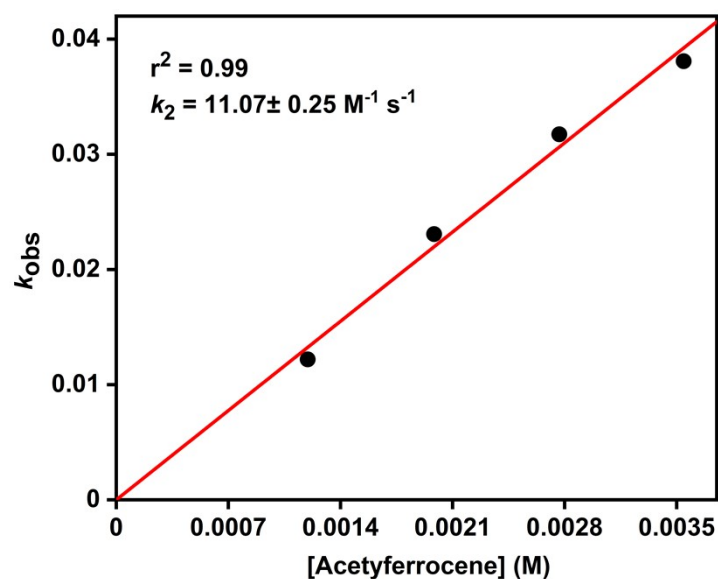

**Figure S37.** A plot of  $k_{obs}$  ( $s^{-1}$ ) vs. [acetylferrocene] for the determination of second order rate constant ( $k_2$ ) value for the reaction of **1-ox** with acetylferrocene at  $-60$  °C.

**Table S7.** Summary of the bond distances of calculated Cu-based complexes. Bond distances are in Å.

| Complexes                                                        | Cu-N <sub>1</sub> | Cu-N <sub>2</sub> | Cu-N <sub>3</sub> | Cu-N <sub>4</sub> | Cu-O<br>(Perchlorate) | Cu-N<br>(Acetonitrile) | Cu-O<br>(Methanol) |
|------------------------------------------------------------------|-------------------|-------------------|-------------------|-------------------|-----------------------|------------------------|--------------------|
| <b>1</b> with perchlorate                                        | 1.931<br>81       | 1.951<br>27       | 1.9568<br>6       | 1.9461<br>0       | 2.44430               |                        |                    |
| <b>1</b> without solvent or perchlorate                          | 1.941<br>36       | 1.951<br>78       | 1.9500<br>6       | 1.9276<br>0       |                       |                        |                    |
| <b>1</b> with bound acetonitrile                                 | 1.936<br>79       | 1.956<br>71       | 1.9592<br>4       | 1.9557<br>8       |                       | 2.36773                |                    |
| Ligand oxidized <b>1-ox</b> without bound solvent or perchlorate | 1.932<br>36       | 1.965<br>24       | 1.9650<br>0       | 1.9474<br>0       |                       |                        |                    |
| Ligand oxidized <b>1-ox</b> with bound perchlorate               | 1.941<br>78       | 1.962<br>10       | 1.9700<br>3       | 1.9554<br>1       | 2.30678               |                        |                    |
| Ligand oxidized <b>1-ox</b> with                                 | 1.968<br>55       | 1.972<br>09       | 1.9887<br>1       | 1.9803<br>5       |                       | 2.06838                |                    |

|                                                              |             |             |             |             |         |         |  |
|--------------------------------------------------------------|-------------|-------------|-------------|-------------|---------|---------|--|
| bound acetonitrile                                           |             |             |             |             |         |         |  |
| Metal oxidized <b>1</b> without bound perchlorate or solvent | 1.885<br>22 | 1.923<br>54 | 1.9170<br>7 | 1.8975<br>3 |         |         |  |
| Metal oxidized <b>1</b> with perchlorate                     | 1.887<br>52 | 1.923<br>94 | 1.9204<br>9 | 1.8988<br>1 | 2.39244 |         |  |
| Metal oxidized <b>1</b> with acetonitrile                    | 1.895<br>22 | 1.922<br>17 | 1.9236<br>4 | 1.9037<br>0 |         | 2.28676 |  |

**Table S8.** Electronic energies and LUMO-HOMO gaps energies at 298.15 K of **1** and **1-ox**

| Complex                                                                                            | Electronic energy (Eh)<br>kcal/mol | LUMO - HOMO gap (eV) |
|----------------------------------------------------------------------------------------------------|------------------------------------|----------------------|
| <b>1</b><br>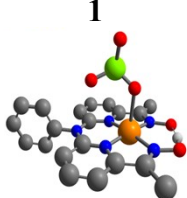    | -<br>3275.5632916<br>22529         | 3.4690164028         |
| <b>1-ox</b><br> | -<br>2647.1320064<br>82481         | 1.557455926          |

|                                                                                                                                                        |                                                                                    |
|--------------------------------------------------------------------------------------------------------------------------------------------------------|------------------------------------------------------------------------------------|
| <p>Electron density differences between <b>1</b> and <b>1-ox</b> showing most of the spin density distributions to be around the iminoxyl radical.</p> | 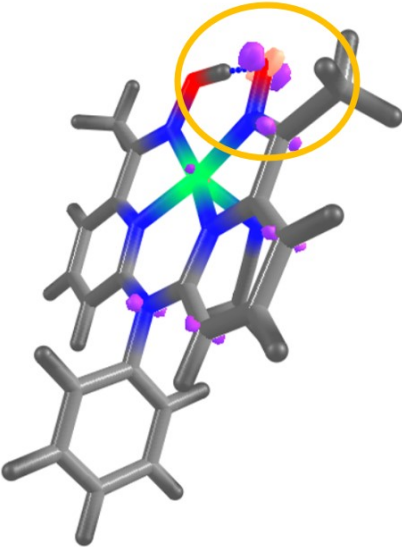 |
| <p><math>\Delta E</math> (kcal/mol) between <b>1-ox</b> and <b>1</b></p>                                                                               | <p>628.43128</p>                                                                   |

**Table S9.** Electronic energies of the starting Cu<sup>II</sup> doublet, Cu<sup>II</sup> radical triplet species, and Cu<sup>III</sup> singlet species.

|                                                        | Electronic energy (Eh) |
|--------------------------------------------------------|------------------------|
| Cu <sup>II</sup> starting doublet species ( <b>1</b> ) | -2971.25780            |
| Cu <sup>II</sup> radical triplet species               | -2971.03479            |
| Cu <sup>III</sup> singlet                              | -2971.06202            |
|                                                        | $\Delta E$ (kcal/mol)  |
| Triplet-doublet                                        | 0.22301                |
| Singlet-doublet                                        | 0.19578                |

The following Tables present the DFT optimized coordinates that were obtained using the BP-86<sup>14</sup> functional, the CPCM model, and the atom-pairwise Grimme dispersion correction with the Becke-Johnson damping scheme (D3BJ)<sup>16, 23</sup>.



**Table S10. 1** with perchlorate

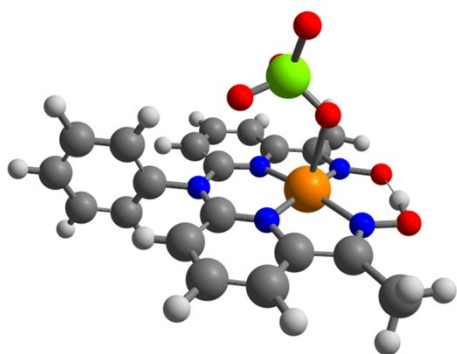

|    |             |              |              |
|----|-------------|--------------|--------------|
| 29 | 5.578649000 | 9.066882000  | 4.317758000  |
| 8  | 8.054630000 | 10.558265000 | 4.698605000  |
| 8  | 7.431166000 | 8.900713000  | 6.501450000  |
| 7  | 2.773109000 | 8.459755000  | 2.817299000  |
| 1  | 7.873571000 | 9.867446000  | 5.507669000  |
| 7  | 4.746448000 | 9.811060000  | 2.723718000  |
| 7  | 4.058067000 | 7.967906000  | 4.778157000  |
| 7  | 6.280393000 | 8.480908000  | 6.041608000  |
| 7  | 6.963572000 | 10.392491000 | 3.925276000  |
| 6  | 3.572356000 | 9.434669000  | 2.199358000  |
| 6  | 5.510768000 | 7.618265000  | 6.666221000  |
| 6  | 4.270630000 | 7.297523000  | 5.952577000  |
| 6  | 1.584420000 | 8.078062000  | 2.073334000  |
| 6  | 2.977425000 | 7.750678000  | 4.016104000  |
| 6  | 1.678506000 | 7.056191000  | 1.128494000  |
| 1  | 2.636683000 | 6.560694000  | 0.969526000  |
| 6  | 5.528060000 | 10.766989000 | 2.138632000  |
| 6  | 2.018160000 | 6.795173000  | 4.430564000  |
| 1  | 1.135202000 | 6.598106000  | 3.831660000  |
| 6  | 3.128496000 | 10.038668000 | 0.994258000  |
| 1  | 2.180731000 | 9.754301000  | 0.548785000  |
| 6  | 3.349467000 | 6.359043000  | 6.406555000  |
| 1  | 3.515231000 | 5.823156000  | 7.338711000  |
| 6  | 6.788251000 | 11.089077000 | 2.840543000  |
| 6  | 0.537797000 | 6.690655000  | 0.409699000  |
| 1  | 0.598629000 | 5.893108000  | -0.331767000 |
| 6  | 2.218672000 | 6.114284000  | 5.621325000  |
| 1  | 1.480952000 | 5.378028000  | 5.941719000  |
| 6  | 0.380335000 | 8.738549000  | 2.316589000  |
| 1  | 0.341075000 | 9.531942000  | 3.063981000  |
| 6  | 5.139058000 | 11.386831000 | 0.959807000  |
| 1  | 5.764827000 | 12.145909000 | 0.495318000  |
| 6  | 5.863967000 | 7.000111000  | 7.977496000  |

|    |              |              |              |
|----|--------------|--------------|--------------|
| 1  | 5.055070000  | 7.141890000  | 8.708767000  |
| 1  | 6.782831000  | 7.451945000  | 8.366475000  |
| 1  | 6.023048000  | 5.916294000  | 7.866677000  |
| 6  | -0.676663000 | 7.345242000  | 0.640908000  |
| 1  | -1.565307000 | 7.057619000  | 0.077410000  |
| 6  | 3.917035000  | 11.002673000 | 0.391309000  |
| 1  | 3.575950000  | 11.467204000 | -0.534128000 |
| 6  | -0.755789000 | 8.366939000  | 1.593132000  |
| 1  | -1.702801000 | 8.876751000  | 1.773907000  |
| 6  | 7.738526000  | 12.120143000 | 2.336011000  |
| 1  | 8.079174000  | 11.863453000 | 1.322066000  |
| 1  | 8.607253000  | 12.194669000 | 2.997300000  |
| 1  | 7.244561000  | 13.101421000 | 2.279270000  |
| 17 | 6.170224000  | 6.176430000  | 2.593302000  |
| 8  | 7.111845000  | 5.400097000  | 1.777528000  |
| 8  | 5.023704000  | 6.593731000  | 1.774214000  |
| 8  | 6.870968000  | 7.385489000  | 3.102254000  |
| 8  | 5.705769000  | 5.371371000  | 3.729169000  |

**Table S11. 1** without solvent or perchlorate

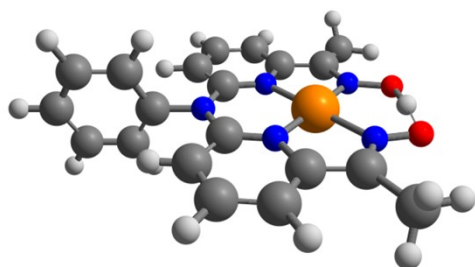

|    |             |              |             |
|----|-------------|--------------|-------------|
| 29 | 5.509998000 | 9.175509000  | 4.398094000 |
| 8  | 8.001310000 | 10.637920000 | 4.765167000 |
| 8  | 7.369707000 | 8.989195000  | 6.571183000 |
| 7  | 2.808278000 | 8.411051000  | 2.785016000 |
| 1  | 7.814005000 | 9.958329000  | 5.580804000 |
| 7  | 4.756973000 | 9.800810000  | 2.721537000 |
| 7  | 4.079375000 | 7.935584000  | 4.760798000 |
| 7  | 6.244614000 | 8.533035000  | 6.086378000 |
| 7  | 6.929068000 | 10.446076000 | 3.972264000 |
| 6  | 3.603709000 | 9.393822000  | 2.172437000 |
| 6  | 5.508257000 | 7.616133000  | 6.674533000 |
| 6  | 4.288677000 | 7.266341000  | 5.938662000 |
| 6  | 1.594587000 | 8.063233000  | 2.062715000 |
| 6  | 3.005157000 | 7.709535000  | 3.990212000 |
| 6  | 1.636861000 | 7.042037000  | 1.113850000 |

|   |              |              |              |
|---|--------------|--------------|--------------|
| 1 | 2.574332000  | 6.517354000  | 0.926046000  |
| 6 | 5.542264000  | 10.754410000 | 2.134211000  |
| 6 | 2.049473000  | 6.746929000  | 4.398798000  |
| 1 | 1.172110000  | 6.543703000  | 3.793924000  |
| 6 | 3.180824000  | 9.968896000  | 0.945440000  |
| 1 | 2.250686000  | 9.659095000  | 0.480554000  |
| 6 | 3.375817000  | 6.314669000  | 6.379892000  |
| 1 | 3.537890000  | 5.780986000  | 7.313874000  |
| 6 | 6.781924000  | 11.104113000 | 2.858847000  |
| 6 | 0.469863000  | 6.712024000  | 0.420387000  |
| 1 | 0.490672000  | 5.915627000  | -0.324141000 |
| 6 | 2.249750000  | 6.064322000  | 5.587965000  |
| 1 | 1.515486000  | 5.323020000  | 5.903925000  |
| 6 | 0.416819000  | 8.758976000  | 2.334679000  |
| 1 | 0.418118000  | 9.550889000  | 3.084472000  |
| 6 | 5.174023000  | 11.343808000 | 0.934598000  |
| 1 | 5.800710000  | 12.101719000 | 0.469622000  |
| 6 | 5.870953000  | 6.980917000  | 7.974411000  |
| 1 | 5.093310000  | 7.166637000  | 8.730351000  |
| 1 | 6.821584000  | 7.387604000  | 8.335212000  |
| 1 | 5.968156000  | 5.890626000  | 7.863084000  |
| 6 | -0.718934000 | 7.401429000  | 0.681430000  |
| 1 | -1.628253000 | 7.141421000  | 0.138223000  |
| 6 | 3.969979000  | 10.933177000 | 0.344931000  |
| 1 | 3.645954000  | 11.375618000 | -0.597081000 |
| 6 | -0.745850000 | 8.422681000  | 1.636954000  |
| 1 | -1.672720000 | 8.959625000  | 1.840954000  |
| 6 | 7.746496000  | 12.115492000 | 2.343753000  |
| 1 | 8.108814000  | 11.825601000 | 1.346525000  |
| 1 | 8.599689000  | 12.210801000 | 3.022054000  |
| 1 | 7.256086000  | 13.095121000 | 2.243560000  |

**Table S12. 1** with bound acetonitrile

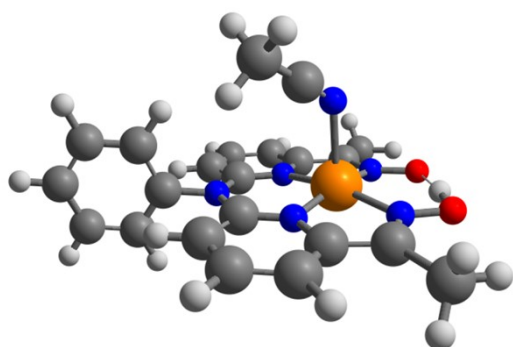

|    |             |              |              |
|----|-------------|--------------|--------------|
| 29 | 5.682608000 | 8.458134000  | 3.990993000  |
| 8  | 8.112755000 | 10.017005000 | 4.411833000  |
| 8  | 7.437264000 | 8.431360000  | 6.262670000  |
| 7  | 2.925702000 | 7.788467000  | 2.432593000  |
| 1  | 7.915046000 | 9.353797000  | 5.236253000  |
| 7  | 4.866169000 | 9.185692000  | 2.369522000  |
| 7  | 4.112966000 | 7.436405000  | 4.484411000  |
| 7  | 6.297453000 | 8.000078000  | 5.791235000  |
| 7  | 7.051029000 | 9.807206000  | 3.608840000  |
| 6  | 3.738704000 | 8.743423000  | 1.796677000  |
| 6  | 5.470796000 | 7.227985000  | 6.461613000  |
| 6  | 4.243076000 | 6.892519000  | 5.734390000  |
| 6  | 1.779217000 | 7.342566000  | 1.658794000  |
| 6  | 3.037131000 | 7.215645000  | 3.716524000  |
| 6  | 1.907347000 | 6.208826000  | 0.857128000  |
| 1  | 2.857387000 | 5.674936000  | 0.826724000  |
| 6  | 5.666138000 | 10.116985000 | 1.770740000  |
| 6  | 1.997816000 | 6.385073000  | 4.199763000  |
| 1  | 1.115417000 | 6.192340000  | 3.598630000  |
| 6  | 3.369144000 | 9.240415000  | 0.520521000  |
| 1  | 2.467147000 | 8.891089000  | 0.028856000  |
| 6  | 3.245069000 | 6.071837000  | 6.253102000  |
| 1  | 3.345001000 | 5.635599000  | 7.244623000  |
| 6  | 6.887331000 | 10.490338000 | 2.513440000  |
| 6  | 0.809385000 | 5.778146000  | 0.108125000  |
| 1  | 0.899186000 | 4.893027000  | -0.522418000 |
| 6  | 2.118561000 | 5.824844000  | 5.462530000  |
| 1  | 1.318361000 | 5.186956000  | 5.838564000  |
| 6  | 0.580272000 | 8.052701000  | 1.729556000  |
| 1  | 0.511263000 | 8.935572000  | 2.366253000  |
| 6  | 5.340638000 | 10.646820000 | 0.529543000  |
| 1  | 5.979890000 | 11.386684000 | 0.052747000  |
| 6  | 5.744242000 | 6.736936000  | 7.843902000  |

|   |              |              |              |
|---|--------------|--------------|--------------|
| 1 | 4.971268000  | 7.086935000  | 8.544486000  |
| 1 | 6.720428000  | 7.100601000  | 8.181644000  |
| 1 | 5.742725000  | 5.637070000  | 7.874961000  |
| 6 | -0.398361000 | 6.481002000  | 0.167954000  |
| 1 | -1.253766000 | 6.142943000  | -0.418155000 |
| 6 | 4.173834000  | 10.185216000 | -0.093256000 |
| 1 | 3.890155000  | 10.569313000 | -1.073143000 |
| 6 | -0.512900000 | 7.616174000  | 0.977558000  |
| 1 | -1.454684000 | 8.163671000  | 1.025037000  |
| 6 | 7.826357000  | 11.539173000 | 2.024961000  |
| 1 | 7.287565000  | 12.476686000 | 1.827275000  |
| 1 | 8.293188000  | 11.221230000 | 1.080373000  |
| 1 | 8.611755000  | 11.722416000 | 2.764468000  |
| 7 | 6.665032000  | 6.703155000  | 2.741574000  |
| 6 | 6.404222000  | 6.380130000  | 1.654603000  |
| 6 | 6.049587000  | 6.016716000  | 0.300178000  |
| 1 | 5.690284000  | 4.979267000  | 0.271253000  |
| 1 | 6.923089000  | 6.119215000  | -0.357687000 |
| 1 | 5.250285000  | 6.683454000  | -0.055689000 |

**Table S13.** Ligand oxidized **1-ox** without bound solvent or perchlorate

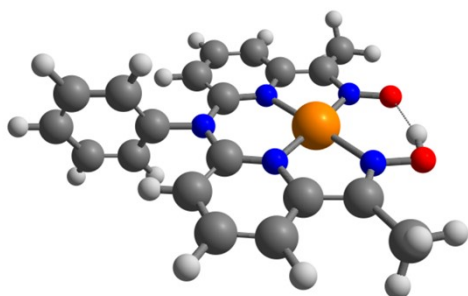

|    |             |              |             |
|----|-------------|--------------|-------------|
| 29 | 5.533429000 | 9.187214000  | 4.408935000 |
| 8  | 8.057685000 | 10.720596000 | 4.710518000 |
| 8  | 7.315890000 | 8.907284000  | 6.648829000 |
| 7  | 2.822471000 | 8.408526000  | 2.796578000 |
| 1  | 7.943179000 | 10.111024000 | 5.503540000 |
| 7  | 4.771262000 | 9.803698000  | 2.726256000 |
| 7  | 4.097011000 | 7.944841000  | 4.765622000 |
| 7  | 6.238655000 | 8.517290000  | 6.116572000 |
| 7  | 6.950663000 | 10.471697000 | 3.958648000 |
| 6  | 3.618597000 | 9.397800000  | 2.178953000 |
| 6  | 5.461814000 | 7.571067000  | 6.704089000 |
| 6  | 4.278085000 | 7.262468000  | 5.942035000 |
| 6  | 1.603200000 | 8.060267000  | 2.073567000 |
| 6  | 3.031041000 | 7.722579000  | 3.988826000 |

|   |              |              |              |
|---|--------------|--------------|--------------|
| 6 | 1.652580000  | 7.049159000  | 1.115282000  |
| 1 | 2.591847000  | 6.530867000  | 0.919650000  |
| 6 | 5.546496000  | 10.753896000 | 2.130938000  |
| 6 | 2.064213000  | 6.746288000  | 4.392363000  |
| 1 | 1.198295000  | 6.548015000  | 3.768616000  |
| 6 | 3.183318000  | 9.965216000  | 0.957447000  |
| 1 | 2.249590000  | 9.652328000  | 0.502230000  |
| 6 | 3.349018000  | 6.304515000  | 6.377249000  |
| 1 | 3.504176000  | 5.771734000  | 7.313232000  |
| 6 | 6.790309000  | 11.116367000 | 2.841929000  |
| 6 | 0.483464000  | 6.722555000  | 0.423955000  |
| 1 | 0.504230000  | 5.931619000  | -0.326036000 |
| 6 | 2.233859000  | 6.053881000  | 5.578951000  |
| 1 | 1.493468000  | 5.313807000  | 5.879645000  |
| 6 | 0.427358000  | 8.752561000  | 2.359558000  |
| 1 | 0.429445000  | 9.537678000  | 3.116281000  |
| 6 | 5.169710000  | 11.339426000 | 0.927920000  |
| 1 | 5.794933000  | 12.095840000 | 0.458663000  |
| 6 | 5.821835000  | 6.941804000  | 7.993721000  |
| 1 | 5.037880000  | 7.131258000  | 8.742927000  |
| 1 | 6.773188000  | 7.341025000  | 8.357781000  |
| 1 | 5.904799000  | 5.850532000  | 7.878022000  |
| 6 | -0.706413000 | 7.405618000  | 0.696022000  |
| 1 | -1.616494000 | 7.146857000  | 0.153877000  |
| 6 | 3.966401000  | 10.930032000 | 0.345357000  |
| 1 | 3.635620000  | 11.369112000 | -0.595386000 |
| 6 | -0.735342000 | 8.417014000  | 1.661552000  |
| 1 | -1.663894000 | 8.946622000  | 1.875578000  |
| 6 | 7.739087000  | 12.127529000 | 2.303890000  |
| 1 | 8.083881000  | 11.825798000 | 1.303898000  |
| 1 | 8.602938000  | 12.241465000 | 2.964219000  |
| 1 | 7.233824000  | 13.099134000 | 2.198806000  |

**Table S14.** Ligand oxidized **1-ox** with bound perchlorate

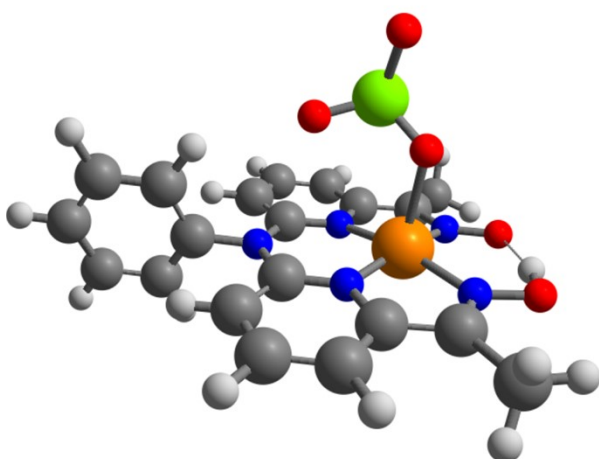

|    |             |              |              |
|----|-------------|--------------|--------------|
| 29 | 5.642202000 | 9.012935000  | 4.254940000  |
| 8  | 8.141605000 | 10.577985000 | 4.584207000  |
| 8  | 7.411345000 | 8.779696000  | 6.510223000  |
| 7  | 2.795514000 | 8.442578000  | 2.788533000  |
| 1  | 8.034680000 | 9.942635000  | 5.362822000  |
| 7  | 4.768072000 | 9.800204000  | 2.692978000  |
| 7  | 4.079981000 | 7.968817000  | 4.744623000  |
| 7  | 6.293281000 | 8.445119000  | 6.016616000  |
| 7  | 7.005639000 | 10.379886000 | 3.863137000  |
| 6  | 3.581696000 | 9.446597000  | 2.183881000  |
| 6  | 5.467024000 | 7.588546000  | 6.662337000  |
| 6  | 4.260022000 | 7.302603000  | 5.926321000  |
| 6  | 1.593555000 | 8.076019000  | 2.048662000  |
| 6  | 3.010730000 | 7.747434000  | 3.973775000  |
| 6  | 1.690836000 | 7.111983000  | 1.046478000  |
| 1  | 2.652883000 | 6.644466000  | 0.837000000  |
| 6  | 5.526576000 | 10.775797000 | 2.119981000  |
| 6  | 2.052450000 | 6.763683000  | 4.372803000  |
| 1  | 1.201241000 | 6.541502000  | 3.737095000  |
| 6  | 3.097721000 | 10.088664000 | 1.019296000  |
| 1  | 2.134538000 | 9.820233000  | 0.598206000  |
| 6  | 3.319843000 | 6.362285000  | 6.377890000  |
| 1  | 3.465602000 | 5.845839000  | 7.324095000  |
| 6  | 6.801282000 | 11.091300000 | 2.795500000  |
| 6  | 0.539988000 | 6.766633000  | 0.334139000  |
| 1  | 0.598439000 | 6.011570000  | -0.450178000 |
| 6  | 2.216480000 | 6.089604000  | 5.570533000  |
| 1  | 1.482018000 | 5.344107000  | 5.872492000  |
| 6  | 0.387086000 | 8.703566000  | 2.357007000  |
| 1  | 0.352500000 | 9.455034000  | 3.146429000  |
| 6  | 5.102318000 | 11.434430000 | 0.969841000  |

|    |              |              |              |
|----|--------------|--------------|--------------|
| 1  | 5.715968000  | 12.210024000 | 0.516889000  |
| 6  | 5.822117000  | 6.997288000  | 7.972819000  |
| 1  | 4.944657000  | 6.917005000  | 8.625593000  |
| 1  | 6.594039000  | 7.602768000  | 8.459825000  |
| 1  | 6.226666000  | 5.981818000  | 7.825379000  |
| 6  | -0.679903000 | 7.384551000  | 0.628479000  |
| 1  | -1.575399000 | 7.111466000  | 0.069257000  |
| 6  | 3.867912000  | 11.074178000 | 0.422899000  |
| 1  | 3.499691000  | 11.571172000 | -0.474137000 |
| 6  | -0.756978000 | 8.349818000  | 1.637649000  |
| 1  | -1.708277000 | 8.830016000  | 1.867924000  |
| 6  | 7.728029000  | 12.136308000 | 2.281925000  |
| 1  | 8.034956000  | 11.895692000 | 1.253505000  |
| 1  | 8.616987000  | 12.212163000 | 2.914043000  |
| 1  | 7.220278000  | 13.111719000 | 2.254987000  |
| 17 | 6.172854000  | 6.080410000  | 2.837030000  |
| 8  | 7.091856000  | 5.278542000  | 2.031698000  |
| 8  | 4.916232000  | 6.303024000  | 2.113027000  |
| 8  | 6.822860000  | 7.404945000  | 3.096636000  |
| 8  | 5.903010000  | 5.424143000  | 4.119512000  |

**Table S15.** Ligand oxidized **1-ox** with bound acetonitrile

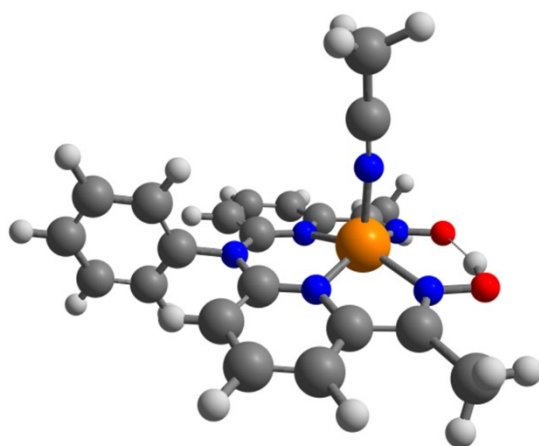

|    |             |             |             |
|----|-------------|-------------|-------------|
| 29 | 5.737270000 | 8.268227000 | 3.700194000 |
| 8  | 8.211837000 | 9.876705000 | 4.092022000 |
| 8  | 7.468408000 | 8.116464000 | 6.004433000 |
| 7  | 2.776550000 | 7.924010000 | 2.376563000 |
| 1  | 8.109205000 | 9.219408000 | 4.857505000 |
| 7  | 4.763485000 | 9.254647000 | 2.285798000 |
| 7  | 4.062872000 | 7.445060000 | 4.327858000 |
| 7  | 6.331338000 | 7.824030000 | 5.527458000 |
| 7  | 7.051296000 | 9.730799000 | 3.401575000 |



|   |              |              |              |
|---|--------------|--------------|--------------|
| 6 | 3.559573000  | 8.943362000  | 1.789930000  |
| 6 | 5.432247000  | 7.131841000  | 6.263330000  |
| 6 | 4.195331000  | 6.878122000  | 5.564582000  |
| 6 | 1.584367000  | 7.549847000  | 1.624486000  |
| 6 | 2.955369000  | 7.279103000  | 3.598005000  |
| 6 | 1.694186000  | 6.549241000  | 0.660592000  |
| 1 | 2.655059000  | 6.063216000  | 0.489554000  |
| 6 | 5.505945000  | 10.264636000 | 1.756810000  |
| 6 | 1.918263000  | 6.419290000  | 4.077079000  |
| 1 | 1.037576000  | 6.232615000  | 3.470655000  |
| 6 | 3.053242000  | 9.641508000  | 0.669177000  |
| 1 | 2.082362000  | 9.393775000  | 0.252442000  |
| 6 | 3.174579000  | 6.073146000  | 6.100879000  |
| 1 | 3.277001000  | 5.630760000  | 7.088770000  |
| 6 | 6.801316000  | 10.532330000 | 2.409135000  |
| 6 | 0.556473000  | 6.190908000  | -0.067293000 |
| 1 | 0.625162000  | 5.407521000  | -0.822411000 |
| 6 | 2.040640000  | 5.833473000  | 5.325124000  |
| 1 | 1.245707000  | 5.188156000  | 5.696707000  |
| 6 | 0.377788000  | 8.201671000  | 1.880532000  |
| 1 | 0.331903000  | 8.981396000  | 2.641575000  |
| 6 | 5.051779000  | 10.996204000 | 0.660649000  |
| 1 | 5.654262000  | 11.800371000 | 0.243849000  |
| 6 | 5.760451000  | 6.716004000  | 7.646004000  |
| 1 | 4.911766000  | 6.256987000  | 8.158479000  |
| 1 | 6.099539000  | 7.591574000  | 8.219728000  |
| 1 | 6.602701000  | 6.005652000  | 7.629294000  |
| 6 | -0.662206000 | 6.832117000  | 0.174951000  |
| 1 | -1.547361000 | 6.548700000  | -0.395403000 |
| 6 | 3.810241000  | 10.662741000 | 0.115059000  |
| 1 | 3.424149000  | 11.207583000 | -0.745919000 |
| 6 | -0.752136000 | 7.834256000  | 1.146829000  |
| 1 | -1.703099000 | 8.332321000  | 1.336913000  |
| 6 | 7.700546000  | 11.630159000 | 1.959524000  |
| 1 | 7.171127000  | 12.593241000 | 1.997840000  |
| 1 | 8.006538000  | 11.463310000 | 0.916030000  |
| 1 | 8.592380000  | 11.684049000 | 2.589727000  |
| 7 | 6.523114000  | 6.729731000  | 2.562797000  |
| 6 | 6.872036000  | 5.861326000  | 1.880098000  |
| 6 | 7.310481000  | 4.777843000  | 1.031658000  |
| 1 | 6.885449000  | 3.831597000  | 1.393781000  |
| 1 | 8.407266000  | 4.715330000  | 1.050906000  |
| 1 | 6.974201000  | 4.957407000  | 0.001212000  |

**Table S16.** Metal oxidized **1** without bound perchlorate or solvent

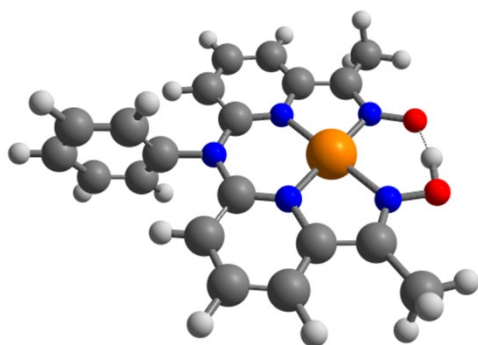

|    |             |              |              |
|----|-------------|--------------|--------------|
| 29 | 5.494580000 | 9.172240000  | 4.381679000  |
| 8  | 7.961697000 | 10.566366000 | 4.755895000  |
| 8  | 7.341453000 | 9.007552000  | 6.501829000  |
| 7  | 2.795150000 | 8.419307000  | 2.785757000  |
| 1  | 7.798841000 | 9.894674000  | 5.603850000  |
| 7  | 4.750366000 | 9.793707000  | 2.750560000  |
| 7  | 4.094758000 | 7.963126000  | 4.745791000  |
| 7  | 6.235800000 | 8.550144000  | 6.044090000  |
| 7  | 6.909198000 | 10.402499000 | 3.981065000  |
| 6  | 3.592999000 | 9.395700000  | 2.196564000  |
| 6  | 5.505512000 | 7.634847000  | 6.642818000  |
| 6  | 4.295025000 | 7.287738000  | 5.926121000  |
| 6  | 1.583785000 | 8.060821000  | 2.056657000  |
| 6  | 3.011968000 | 7.735882000  | 3.979598000  |
| 6  | 1.646176000 | 7.040500000  | 1.108687000  |
| 1  | 2.589898000 | 6.525647000  | 0.925735000  |
| 6  | 5.536747000 | 10.750042000 | 2.156518000  |
| 6  | 2.062403000 | 6.772986000  | 4.404491000  |
| 1  | 1.186469000 | 6.580747000  | 3.793504000  |
| 6  | 3.175704000 | 9.986168000  | 0.975498000  |
| 1  | 2.240369000 | 9.674478000  | 0.521906000  |
| 6  | 3.386496000 | 6.343840000  | 6.373654000  |
| 1  | 3.558531000 | 5.818143000  | 7.310112000  |
| 6  | 6.764933000 | 11.074318000 | 2.868936000  |
| 6  | 0.484935000 | 6.700739000  | 0.410995000  |
| 1  | 0.516488000 | 5.905174000  | -0.333696000 |
| 6  | 2.255547000 | 6.091076000  | 5.588708000  |
| 1  | 1.520009000 | 5.353317000  | 5.907997000  |
| 6  | 0.401488000 | 8.748060000  | 2.327958000  |
| 1  | 0.392700000 | 9.539276000  | 3.078230000  |
| 6  | 5.166425000 | 11.346823000 | 0.965408000  |
| 1  | 5.802316000 | 12.102318000 | 0.509438000  |

|   |              |              |              |
|---|--------------|--------------|--------------|
| 6 | 5.896918000  | 7.020333000  | 7.940058000  |
| 1 | 5.123964000  | 7.222686000  | 8.696375000  |
| 1 | 6.853858000  | 7.418261000  | 8.287970000  |
| 1 | 5.976510000  | 5.929151000  | 7.827012000  |
| 6 | -0.710935000 | 7.379075000  | 0.668311000  |
| 1 | -1.615161000 | 7.110478000  | 0.121101000  |
| 6 | 3.959039000  | 10.949705000 | 0.375270000  |
| 1 | 3.632608000  | 11.399857000 | -0.561730000 |
| 6 | -0.753488000 | 8.399611000  | 1.623998000  |
| 1 | -1.686480000 | 8.926952000  | 1.823760000  |
| 6 | 7.751673000  | 12.070320000 | 2.376634000  |
| 1 | 8.102978000  | 11.779880000 | 1.375487000  |
| 1 | 8.606133000  | 12.145868000 | 3.053670000  |
| 1 | 7.270216000  | 13.055473000 | 2.286832000  |

**Table S17.** Metal oxidized **1** with perchlorate

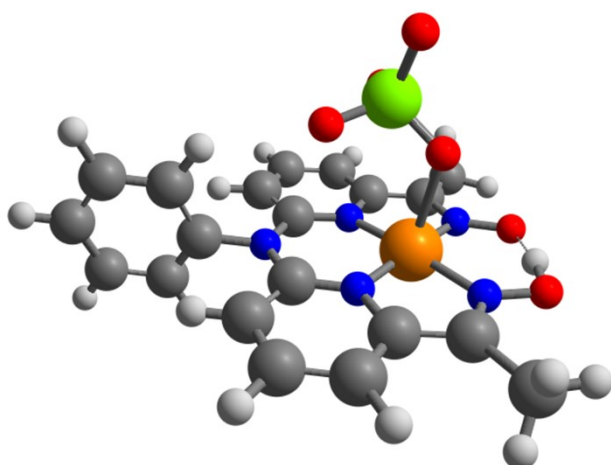

|    |             |              |             |
|----|-------------|--------------|-------------|
| 29 | 5.526490000 | 9.108531000  | 4.325423000 |
| 8  | 8.008050000 | 10.487483000 | 4.684215000 |
| 8  | 7.404796000 | 8.900164000  | 6.414604000 |
| 7  | 2.756772000 | 8.463236000  | 2.808863000 |
| 1  | 7.849648000 | 9.805028000  | 5.523976000 |
| 7  | 4.729257000 | 9.810521000  | 2.751534000 |
| 7  | 4.066176000 | 7.993593000  | 4.757991000 |
| 7  | 6.262478000 | 8.497927000  | 5.994866000 |
| 7  | 6.927620000 | 10.364030000 | 3.939613000 |
| 6  | 3.557760000 | 9.433539000  | 2.215060000 |
| 6  | 5.508396000 | 7.621314000  | 6.620144000 |
| 6  | 4.272767000 | 7.311539000  | 5.931264000 |
| 6  | 1.567190000 | 8.076667000  | 2.061155000 |
| 6  | 2.978937000 | 7.773308000  | 3.997788000 |

|    |              |              |              |
|----|--------------|--------------|--------------|
| 6  | 1.672936000  | 7.055555000  | 1.117612000  |
| 1  | 2.633071000  | 6.564031000  | 0.959531000  |
| 6  | 5.515219000  | 10.765687000 | 2.157826000  |
| 6  | 2.026921000  | 6.816010000  | 4.426543000  |
| 1  | 1.144710000  | 6.631966000  | 3.822259000  |
| 6  | 3.125450000  | 10.045193000 | 1.010289000  |
| 1  | 2.175051000  | 9.755887000  | 0.573549000  |
| 6  | 3.358088000  | 6.377259000  | 6.388108000  |
| 1  | 3.537268000  | 5.844131000  | 7.318832000  |
| 6  | 6.763261000  | 11.062392000 | 2.847809000  |
| 6  | 0.534323000  | 6.686450000  | 0.397845000  |
| 1  | 0.599868000  | 5.889924000  | -0.343740000 |
| 6  | 2.222350000  | 6.131866000  | 5.609906000  |
| 1  | 1.485004000  | 5.396782000  | 5.931282000  |
| 6  | 0.363165000  | 8.735167000  | 2.306863000  |
| 1  | 0.320324000  | 9.528099000  | 3.054171000  |
| 6  | 5.132002000  | 11.381799000 | 0.979661000  |
| 1  | 5.770645000  | 12.133025000 | 0.520694000  |
| 6  | 5.911772000  | 6.993761000  | 7.907814000  |
| 1  | 5.098757000  | 7.085206000  | 8.641491000  |
| 1  | 6.814688000  | 7.465720000  | 8.304787000  |
| 1  | 6.105306000  | 5.921148000  | 7.753386000  |
| 6  | -0.682627000 | 7.336304000  | 0.628797000  |
| 1  | -1.568982000 | 7.045013000  | 0.064111000  |
| 6  | 3.910515000  | 11.005835000 | 0.406484000  |
| 1  | 3.572602000  | 11.471230000 | -0.518953000 |
| 6  | -0.768973000 | 8.357495000  | 1.580939000  |
| 1  | -1.718322000 | 8.862584000  | 1.760421000  |
| 6  | 7.749724000  | 12.057257000 | 2.350809000  |
| 1  | 8.092091000  | 11.768828000 | 1.345877000  |
| 1  | 8.610537000  | 12.125217000 | 3.020696000  |
| 1  | 7.272919000  | 13.045007000 | 2.268713000  |
| 17 | 6.187016000  | 6.234544000  | 2.690287000  |
| 8  | 7.156187000  | 5.476870000  | 1.899638000  |
| 8  | 5.034016000  | 6.610229000  | 1.861315000  |
| 8  | 6.852397000  | 7.479374000  | 3.180184000  |
| 8  | 5.739084000  | 5.449072000  | 3.844266000  |

**Table S18.** Metal oxidized **1** with acetonitrile

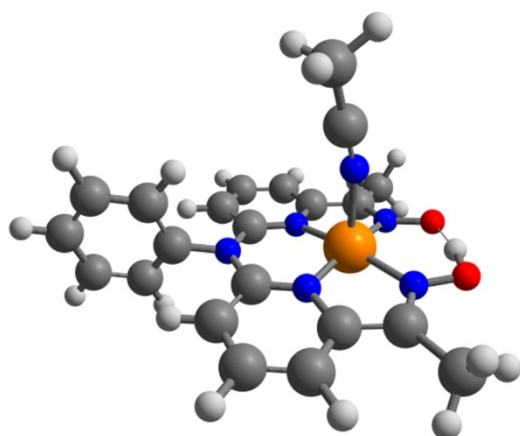

|    |             |              |              |
|----|-------------|--------------|--------------|
| 29 | 5.574144000 | 8.526575000  | 3.874436000  |
| 8  | 8.100207000 | 9.837942000  | 4.194987000  |
| 8  | 7.465419000 | 8.275139000  | 5.949777000  |
| 7  | 2.772502000 | 7.966865000  | 2.410083000  |
| 1  | 7.937592000 | 9.169301000  | 5.037841000  |
| 7  | 4.735409000 | 9.325695000  | 2.363807000  |
| 7  | 4.046282000 | 7.531052000  | 4.390619000  |
| 7  | 6.288091000 | 7.951308000  | 5.563836000  |
| 7  | 6.980269000 | 9.784632000  | 3.499600000  |
| 6  | 3.557185000 | 8.965273000  | 1.833816000  |
| 6  | 5.476413000 | 7.189660000  | 6.265094000  |
| 6  | 4.213670000 | 6.916043000  | 5.608044000  |
| 6  | 1.619739000 | 7.535423000  | 1.629924000  |
| 6  | 2.945684000 | 7.338603000  | 3.643522000  |
| 6  | 1.787460000 | 6.488600000  | 0.724415000  |
| 1  | 2.763954000 | 6.015003000  | 0.618652000  |
| 6  | 5.508333000 | 10.308283000 | 1.799488000  |
| 6  | 1.935499000 | 6.470035000  | 4.123823000  |
| 1  | 1.041844000 | 6.307027000  | 3.530068000  |
| 6  | 3.105995000 | 9.613109000  | 0.656467000  |
| 1  | 2.152050000 | 9.333216000  | 0.220660000  |
| 6  | 3.239045000 | 6.069760000  | 6.114625000  |
| 1  | 3.377529000 | 5.579116000  | 7.074687000  |
| 6  | 6.779463000 | 10.559639000 | 2.467349000  |
| 6  | 0.689680000 | 6.069816000  | -0.031165000 |
| 1  | 0.805446000 | 5.252764000  | -0.743689000 |
| 6  | 2.089711000 | 5.850118000  | 5.348200000  |
| 1  | 1.307618000 | 5.185494000  | 5.714175000  |
| 6  | 0.391358000 | 8.173227000  | 1.801989000  |
| 1  | 0.297196000 | 8.989813000  | 2.518732000  |
| 6  | 5.101165000 | 10.970170000 | 0.653893000  |

|   |              |              |              |
|---|--------------|--------------|--------------|
| 1 | 5.726774000  | 11.742482000 | 0.212481000  |
| 6 | 5.900931000  | 6.670807000  | 7.593479000  |
| 1 | 5.068915000  | 6.196596000  | 8.121207000  |
| 1 | 6.294121000  | 7.495032000  | 8.204888000  |
| 1 | 6.710796000  | 5.935649000  | 7.466963000  |
| 6 | -0.549936000 | 6.697490000  | 0.127513000  |
| 1 | -1.404580000 | 6.367935000  | -0.464271000 |
| 6 | 3.875932000  | 10.604811000 | 0.081886000  |
| 1 | 3.522385000  | 11.103062000 | -0.820269000 |
| 6 | -0.699398000 | 7.746130000  | 1.041445000  |
| 1 | -1.666395000 | 8.234496000  | 1.163700000  |
| 6 | 7.764175000  | 11.570810000 | 2.000855000  |
| 1 | 7.253962000  | 12.511954000 | 1.758028000  |
| 1 | 8.256657000  | 11.208857000 | 1.084656000  |
| 1 | 8.526159000  | 11.753372000 | 2.763962000  |
| 7 | 6.459641000  | 6.818161000  | 2.638921000  |
| 6 | 6.668746000  | 5.974869000  | 1.870653000  |
| 6 | 6.928985000  | 4.924205000  | 0.912154000  |
| 1 | 6.185014000  | 4.124717000  | 1.031381000  |
| 1 | 7.934521000  | 4.512763000  | 1.076160000  |
| 1 | 6.866217000  | 5.330875000  | -0.106475000 |

## References

1. A. Das, A. Ali, G. Gupta, A. Santra, P. Jain, P. P. Ingole, S. Paul and S. Paria, *ACS Catal.*, 2023, **13**, 5285-5297.
2. C. E. Paul, S. Gargiulo, D. J. Opperman, I. Lavandera, V. Gotor-Fernandez, V. Gotor, A. Taglieber, I. W. C. E. Arends and F. Hollmann, *Org. Lett.*, 2013, **15**, 180-183.
3. W. C. Wolsey, *J. Chem. Educ.*, 1973, **50**, A335-A337.
4. (a) S. K. Sur, *J. Magn. Reson.*, 1989, **82**, 169-173; (b) G. A. Bain and J. F. Berry, *J. Chem. Educ.*, 2008, **85**, 532-536.
5. E. P. Parry and R. A. Osteryoung, *Anal. Chem.*, 1965, **37**, 1634-1637.
6. APEX II 2009 Ed.; Bruker Analytical X-ray Systems Inc.: Madison, WI, 2009
7. G. M. Sheldrick, *Acta Crystallogr., Sect. A Found. Crystallogr.*, 2008, **A64**, 112-122.
8. C. F. Macrae, I. J. Bruno, J. A. Chisholm, P. R. Edgington, P. McCabe, E. Pidcock, L. Rodriguez-Monge, R. Taylor, J. van de Streek and P. A. Wood, *J. Appl. Crystallogr.*, 2008, **41**, 466-470.
9. B. Ravel and M. Newville, *J. Synchrotron Radiat.*, 2005, **12**, 537-541.
10. J. J. Rehr and R. C. Albers, *Rev. Mod. Phys.*, 2000, **72**, 621-654.
11. D. C. Koningsberger, R. Prins and Editors, *X-ray Absorption: Principles, Applications, Techniques of EXAFS SEXAFS, and XANES*, 1988.
12. F. Neese, *Wiley Interdiscip. Rev. Comput. Mol. Sci.*, 2012, **2**, 73-78.
13. A. D. Becke, *Phys. Rev. A Gen. Phys.*, 1988, **38**, 3098-3100.
14. F. Weigend and R. Ahlrichs, *Phys. Chem. Chem. Phys.*, 2005, **7**, 3297-3305.

15. (a) S. Grimme, J. Antony, S. Ehrlich and H. Krieg, *J. Chem. Phys.*, 2010, **132**, 154104/154101-154104/154119; (b) S. Grimme, S. Ehrlich and L. Goerigk, *J. Comput. Chem.*, 2011, **32**, 1456-1465.
16. S. Kossmann and F. Neese, *J. Chem. Theory Comput.*, 2010, **6**, 2325-2338.
17. (a) A. D. Becke, *J. Chem. Phys.*, 1993, **98**, 5648-5652; (b) P. J. Stephens, F. J. Devlin, C. F. Chabalowski and M. J. Frisch, *J. Phys. Chem.*, 1994, **98**, 11623-11627.
18. X. Sui, A. C. Weitz, E. R. Farquhar, M. Badiee, S. Banerjee, J. von Lintig, G. P. Tochtrop, K. Palczewski, M. P. Hendrich and P. D. Kiser, *Biochemistry*, 2017, **56**, 2836-2852.
19. B. Bossmann, L. H. Grimme and J. Knoetzel, *Planta*, 1999, **207**, 551-558.
20. D. Yang, K. Yan, W. Wei, L. Tian, Q. Li, J. You and H. Wang, *RSC Adv.*, 2014, **4**, 48547-48553.
